# Supplementary material for: Exploring the Impact of Onobrychis cornuta and Veratrum lobelianum Extracts on C. elegans: Implications for MAPK Modulation, Germline Development, and Antitumor Properties
Source: MDPI journal article supplement (doi:10.3390/nu16010008), 2023-12-19
Supplement: s1 [file s1]

Supplemental Table S1. Samples IDs in 96-well plates (Note that some samples are redundant)

|   | 1   | 2   | 3   | 4   | 5   | 6   | 7   | 8   | 9   | 10  | 11   | 12   |
|---|-----|-----|-----|-----|-----|-----|-----|-----|-----|-----|------|------|
| A | 1H  | 2H  | 3H  | 4H  | 5H  | 6H  | 7H  |     |     |     |      |      |
| B | 1D  | 2D  | 3D  | 4D  | 5D  | 6D  | 7D  |     |     |     |      |      |
| C | 1B  | 2B  | 3B  | 4B  | 5B  | 6B  | 7B  |     |     |     |      |      |
| D | 1A  | 2A  | 3A  | 4A  | 5A  | 6A  | 7A  |     |     |     |      |      |
|   |     |     |     |     |     |     |     |     |     |     |      |      |
|   | 1   | 2   | 3   | 4   | 5   | 6   | 7   | 8   | 9   | 10  | 11   | 12   |
| A | 1H  | 2H  | 3H  | 4H  | 5H  | 6H  | 7H  | 8H  | 9H  | 10H | 11H  | 12H  |
| B | 1D  | 2D  | 3D  | 4D  | 5D  | 6D  | 7D  | 8D  | 9D  | 10D | 11D  | 12D  |
| C | 1B  | 2B  | 3B  | 4B  | 5B  | 6B  | 7B  | 8B  | 9B  | 10B | 11B  | 12B  |
| D | 1A  | 2A  | 3A  | 4A  | 5A  | 6A  | 7A  | 8A  | 9A  | 10A | 11A  | 12A  |
| E | 13H | 14H | 15H | 16H | 17H | 18H | 19H | 20H | 21H | 22H | 23H  | 24H  |
| F | 13D | 14D | 15D | 16D | 17D | 18D | 19D | 20D | 21D | 22D | 23D  | 24D  |
| G | 13B | 14B | 15B | 16B | 17B | 18B | 19B | 20B | 21B | 22B | 23B  | 24B  |
| H | 13A | 14A | 15A | 16A | 17A | 18A | 19A | 20A | 21A | 22A | 23A  | 24A  |
|   |     |     |     |     |     |     |     |     |     |     |      |      |
|   | 1   | 2   | 3   | 4   | 5   | 6   | 7   | 8   | 9   | 10  | 11   | 12   |
| A | 25H | 26H | 27H | 28H | 29H | 30H | 31H | 32H | 33H | 34H | 35H  | 36H  |
| B | 25D | 26D | 27D | 28D | 29D | 30D | 31D | 32D | 33D | 34D | 35D  | 36D  |
| C | 25B | 26B | 27B | 28B | 29B | 30B | 31B | 32B | 33B | 34B | 35B  | 36B  |
| D | 25A | 26A | 27A | 28A | 29A | 30A | 31A | 32A | 33A | 34A | 35A  | 36A  |
| E | 37H | 38H | 39H | 40H | 41H | 42H | 43H | 44H | 45H | 46H | 47H  | 48H  |
| F | 37D | 38D | 39D | 40D | 41D | 42D | 43D | 44D | 45D | 46D | 47D  | 48D  |
| G | 37B | 38B | 39B | 40B | 41B | 42B | 43B | 44B | 45B | 46B | 47B  | 48B  |
| H | 37A | 38A | 39A | 40A | 41A | 42A | 43A | 44A | 45A | 46A | 47A  | 48A  |
|   |     |     |     |     |     |     |     |     |     |     |      |      |
|   | 1   | 2   | 3   | 4   | 5   | 6   | 7   | 8   | 9   | 10  | 11   | 12   |
| A | 49H | 50H | 51H | 52H | 53H | 54H | 55H | 56H | 57H | 58H | 59H  | 60H  |
| B | 49D | 50D | 51D | 52D | 53D | 54D | 55D | 56D | 57D | 58D | 59D  | 60D  |
| C | 49B | 50B | 51B | 52B | 53B | 54B | 55B | 56B | 57B | 58B | 59B  | 60B  |
| D | 49A | 50A | 51A | 52A | 53A | 54A | 55A | 56A | 57A | 58A | 59A  | 60A  |
| E | 61H | 62H | 63H | 64H | 65H | 66H | 67H | 68H | 69H | 70H | 123H | 124H |
| F | 61D | 62D | 63D | 64D | 65D | 66D | 67D | 68D | 69D | 70D | 123D | 124D |
| G | 61B | 62B | 63B | 64B | 65B | 66B | 67B | 68B | 69B | 70B | 123B | 124B |
| H | 61A | 62A | 63A | 64A | 65A | 66A | 67A | 68A | 69A | 70A | 123A | 124A |

Sample IDs and corresponding herbs

|   | Genus             | Species           | Authority     | Family          | Part  |
|---|-------------------|-------------------|---------------|-----------------|-------|
| 1 | <i>Ruscus</i>     | <i>hyrcanus</i>   | Woronow       | Asparagaceae    | LF+FR |
| 2 | <i>Hypericum</i>  | <i>androsæmum</i> | L.            | Clusiaceae      | PL    |
| 3 | <i>Dryopteris</i> | <i>raddeana</i>   | (Fomin) Fomin | Dryopteridaceae | LF    |
| 4 | <i>Buxus</i>      | <i>hyrcana</i>    | Pojark.       | Buxaceae        | RT    |
| 5 | <i>Buxus</i>      | <i>hyrcana</i>    | Pojark.       | Buxaceae        | ST    |
| 6 | <i>Polygonum</i>  | <i>hydropiper</i> | L.            | Polygonaceae    | PL    |
| 7 | <i>Solanum</i>    | <i>dulcamara</i>  | L.            | Solanaceae      | ST+RT |

|    |                      |                      |                   |                  |          |
|----|----------------------|----------------------|-------------------|------------------|----------|
| 8  | <i>Solanum</i>       | <i>dulcamara</i>     | L.                | Solanaceae       | LF+FL+FR |
| 9  | <i>Carex</i>         | <i>sylvatica</i>     | Huds.             | Cyperaceae       | PL       |
| 10 | <i>Crataegus</i>     | <i>microphylla</i>   | K. Koch           | Rosaceae         | ST       |
| 11 | <i>Crataegus</i>     | <i>microphylla</i>   | K. Koch           | Rosaceae         | LF       |
| 12 | <i>Scrophularia</i>  | <i>cinerascens</i>   | Boiss.            | Scrophulariaceae | ST+RT    |
| 13 | <i>Scrophularia</i>  | <i>cinerascens</i>   | Boiss.            | Scrophulariaceae | LF+FL+FR |
| 14 | <i>Zelkova</i>       | <i>carpinifolia</i>  | (Pall.) K. Koch   | Ulmaceae         | ST       |
| 15 | <i>Astragalus</i>    | <i>igniarius</i>     | Popov             | Fabaceae         | ST+RT    |
| 16 | <i>Chaerophyllum</i> | <i>bulbosum</i>      | L.                | Apiaceae         | PL       |
| 17 | <i>Pimpinella</i>    | <i>peregrina</i>     | L.                | Apiaceae         | PL       |
| 18 | <i>Spiraea</i>       | <i>crenata</i>       | L.                | Rosaceae         | PL       |
| 19 | <i>Hypericum</i>     | <i>scabrum</i>       | L.                | Clusiaceae       | PL       |
| 20 | <i>Aethionema</i>    | <i>armenum</i>       | Boiss.            | Brassicaceae     | PL       |
| 21 | <i>Achillea</i>      | <i>biebersteinii</i> | Afan.             | Asteraceae       | PL       |
| 22 | <i>Eremostachys</i>  | <i>macrophylla</i>   | Montbret &        | Lamiaceae        | PL       |
| 23 | <i>Glycyrrhiza</i>   | <i>glabra</i>        | L.                | Fabaceae         | PL       |
| 24 | <i>Camphorosma</i>   | <i>lessingii</i>     | Litv.             | Chenopodiaceae   | PL       |
| 25 | <i>Capparis</i>      | <i>herbacea</i>      | Willd.            | Capparaceae      | PL       |
| 26 | <i>Astracantha</i>   | <i>microcephala</i>  | (Willd.) Poldach. | Fabaceae         | PL       |
| 27 | <i>Chardinia</i>     | <i>orientalis</i>    | (L.) Kuntze       | Asteraceae       | PL       |
| 28 | <i>Thalictrum</i>    | <i>minus</i>         | L.                | Ranunculaceae    | PL       |
| 29 | <i>Thymus</i>        | <i>kotschyannus</i>  | Boiss. & Hohen.   | Lamiaceae        | PL       |
| 30 | <i>Echium</i>        | <i>russicum</i>      | J. F. Gmel.       | Boraginaceae     | PL       |
| 31 | <i>Galium</i>        | <i>verum</i>         | L.                | Rubiaceae        | PL       |
| 32 | <i>Veratrum</i>      | <i>lobelianum</i>    | Bernh.            | Melanthiaceae    | PL       |
| 33 | <i>Caltha</i>        | <i>polypetalaa</i>   | Hochst.           | Ranunculaceae    | PL       |
| 34 | <i>Mentha</i>        | <i>longifolia</i>    | (L.) Huds.        | Lamiaceae        | PL       |
| 35 | <i>Scrophularia</i>  | <i>orientalis</i>    | L.                | Scrophulariaceae | PL       |
| 36 | <i>Lappula</i>       | <i>patula</i>        | (Lehm.) Aschers.  | Boraginaceae     | LF+FL+FR |
| 37 | <i>Galium</i>        | <i>ruthenicum</i>    | Willd.            | Rubiaceae        | ST+RT    |
| 38 | <i>Oberna</i>        | <i>multifida</i>     | (Adams) Ikonn.    | Caryophyllaceae  | PL       |
| 39 | <i>Artemisia</i>     | <i>lercheana</i>     | Weber             | Asteraceae       | ST+RT    |
| 40 | <i>Artemisia</i>     | <i>lercheana</i>     | Weber             | Asteraceae       | LF+FL    |

|     |                     |                       |                     |                  |        |
|-----|---------------------|-----------------------|---------------------|------------------|--------|
| 41  | <i>Echium</i>       | <i>biebersteini</i>   | (Lacaita) Dobrocz.  | Boraginaceae     | ST+RT  |
| 42  | <i>Juniperus</i>    | <i>oblonga</i>        | M. Bieb.            | Cupressaceae     | RT     |
| 43  | <i>Juniperus</i>    | <i>oblonga</i>        | M. Bieb.            | Cupressaceae     | LF+FR  |
| 44  | <i>Juniperus</i>    | <i>oblonga</i>        | M. Bieb.            | Cupressaceae     | ST     |
| 45  | <i>Cruciata</i>     | <i>articulata</i>     | (L.) Ehrend.        | Rubiaceae        | PL     |
| 46  | <i>Symphytum</i>    | <i>caucasicum</i>     | M. Bieb.            | Boraginaceae     | PL     |
| 47  | <i>Ambrosia</i>     | <i>artemisiifolia</i> | L.                  | Asteraceae       | LF+FL  |
| 48  | <i>Ambrosia</i>     | <i>artemisiifolia</i> | L.                  | Asteraceae       | RT     |
| 49  | <i>Ambrosia</i>     | <i>artemisiifolia</i> | L.                  | Asteraceae       | ST     |
| 50  | <i>Stachys</i>      | <i>lavandulifolia</i> | Vahl                | Lamiaceae        | PL     |
| 51  | <i>Zygophyllum</i>  | <i>fabago</i>         | L.                  | Zygophyllaceae   | PL     |
| 52  | <i>Elaeagnus</i>    | <i>orientalis</i>     | L.                  | Elaeagnaceae     | PL     |
| 53  | <i>Lepidium</i>     | <i>vesicarium</i>     | L.                  | Brassicaceae     | PL     |
| 54  | <i>Rhamnus</i>      | <i>pallasii</i>       | Fisch. & C. A. Mey. | Rhamnaceae       | PL     |
| 55  | <i>Atraphaxis</i>   | <i>spinosa</i>        | L.                  | Polygonaceae     | PL     |
| 56  | <i>Onobrychis</i>   | <i>cornuta</i>        | (L.) Desv.          | Fabaceae         | PL     |
| 57  | <i>Geranium</i>     | <i>tuberosum</i>      | L.                  | Geraniaceae      | PL     |
| 58  | <i>Crataegus</i>    | <i>orientalis</i>     | Pall. ex M. Bieb.   | Rosaceae         | LF     |
| 59  | <i>Primula</i>      | <i>macrocalyx</i>     | Bunge               | Primulaceae      | PL     |
| 60  | <i>Caccinia</i>     | <i>macranthes</i>     | (Banks & S.         | Boraginaceae     | PL     |
| 61  | <i>Scutellaria</i>  | <i>orientalis</i>     | L.                  | Lamiaceae        | PL     |
| 62  | <i>Symphytum</i>    | <i>asperum</i>        | Lepech.             | Boraginaceae     | PL     |
| 63  | <i>Melandrium</i>   | <i>album</i>          | (Mill.) Garcke      | Caryophyllaceae  | PL     |
| 64  | <i>Cardaria</i>     | <i>boissieri</i>      | (N. Busch) Soó      | Brassicaceae     | PL     |
| 65  | <i>Euphorbia</i>    | <i>macroceras</i>     | Fisch. & C.A        | Euphorbiaceae    | PL     |
| 66  | <i>Amberboa</i>     | <i>moschata</i>       | (L.) DC.            | Asteraceae       | PL     |
| 67  | <i>Erodium</i>      | <i>oxyrhynchum</i>    | M. Bieb.            | Geraniaceae      | PL     |
| 68  | <i>Anchusa</i>      | <i>azurea</i>         | Mill.               | Boraginaceae     | PL     |
| 69  | <i>Xerophyllum</i>  | <i>tenax</i>          | (Pursh) Nutt.       | Melanthiaceae    | RT+RHZ |
| 70  | <i>Torenia</i>      | <i>sp.</i>            |                     | Scrophulariaceae | PL     |
| 123 | <i>Metrosideros</i> | <i>polymnorpha</i>    |                     | Myrtaceae        | LF     |
| 124 | <i>Artocarpus</i>   | <i>altilis</i>        |                     | Moraceae         | LF     |

|     |                         |                       |               |     |
|-----|-------------------------|-----------------------|---------------|-----|
| 125 | <div>Metrosideros</div> | <div>polymorpha</div> | Myrtaceae     | ST  |
| 126 | <div>Artocarpus</div>   | <div>altilis</div>    | Moraceae      | ST  |
| 127 | <div>Curcuma</div>      | <div>longa</div>      | Zingiberaceae | RHZ |

# Supplemental Figure S1. Compounds found in *Veratrum lobelianum* and *Onobrychis cornuta* extracts

Compounds found in *Veratrum lobelianum* and *Onobrychis cornuta* extracts. The x-axis in an LC-MS graph represents the mass-to-charge ratio ( $m/z$ ). The y-axis represents intensity in counts per second (cps).

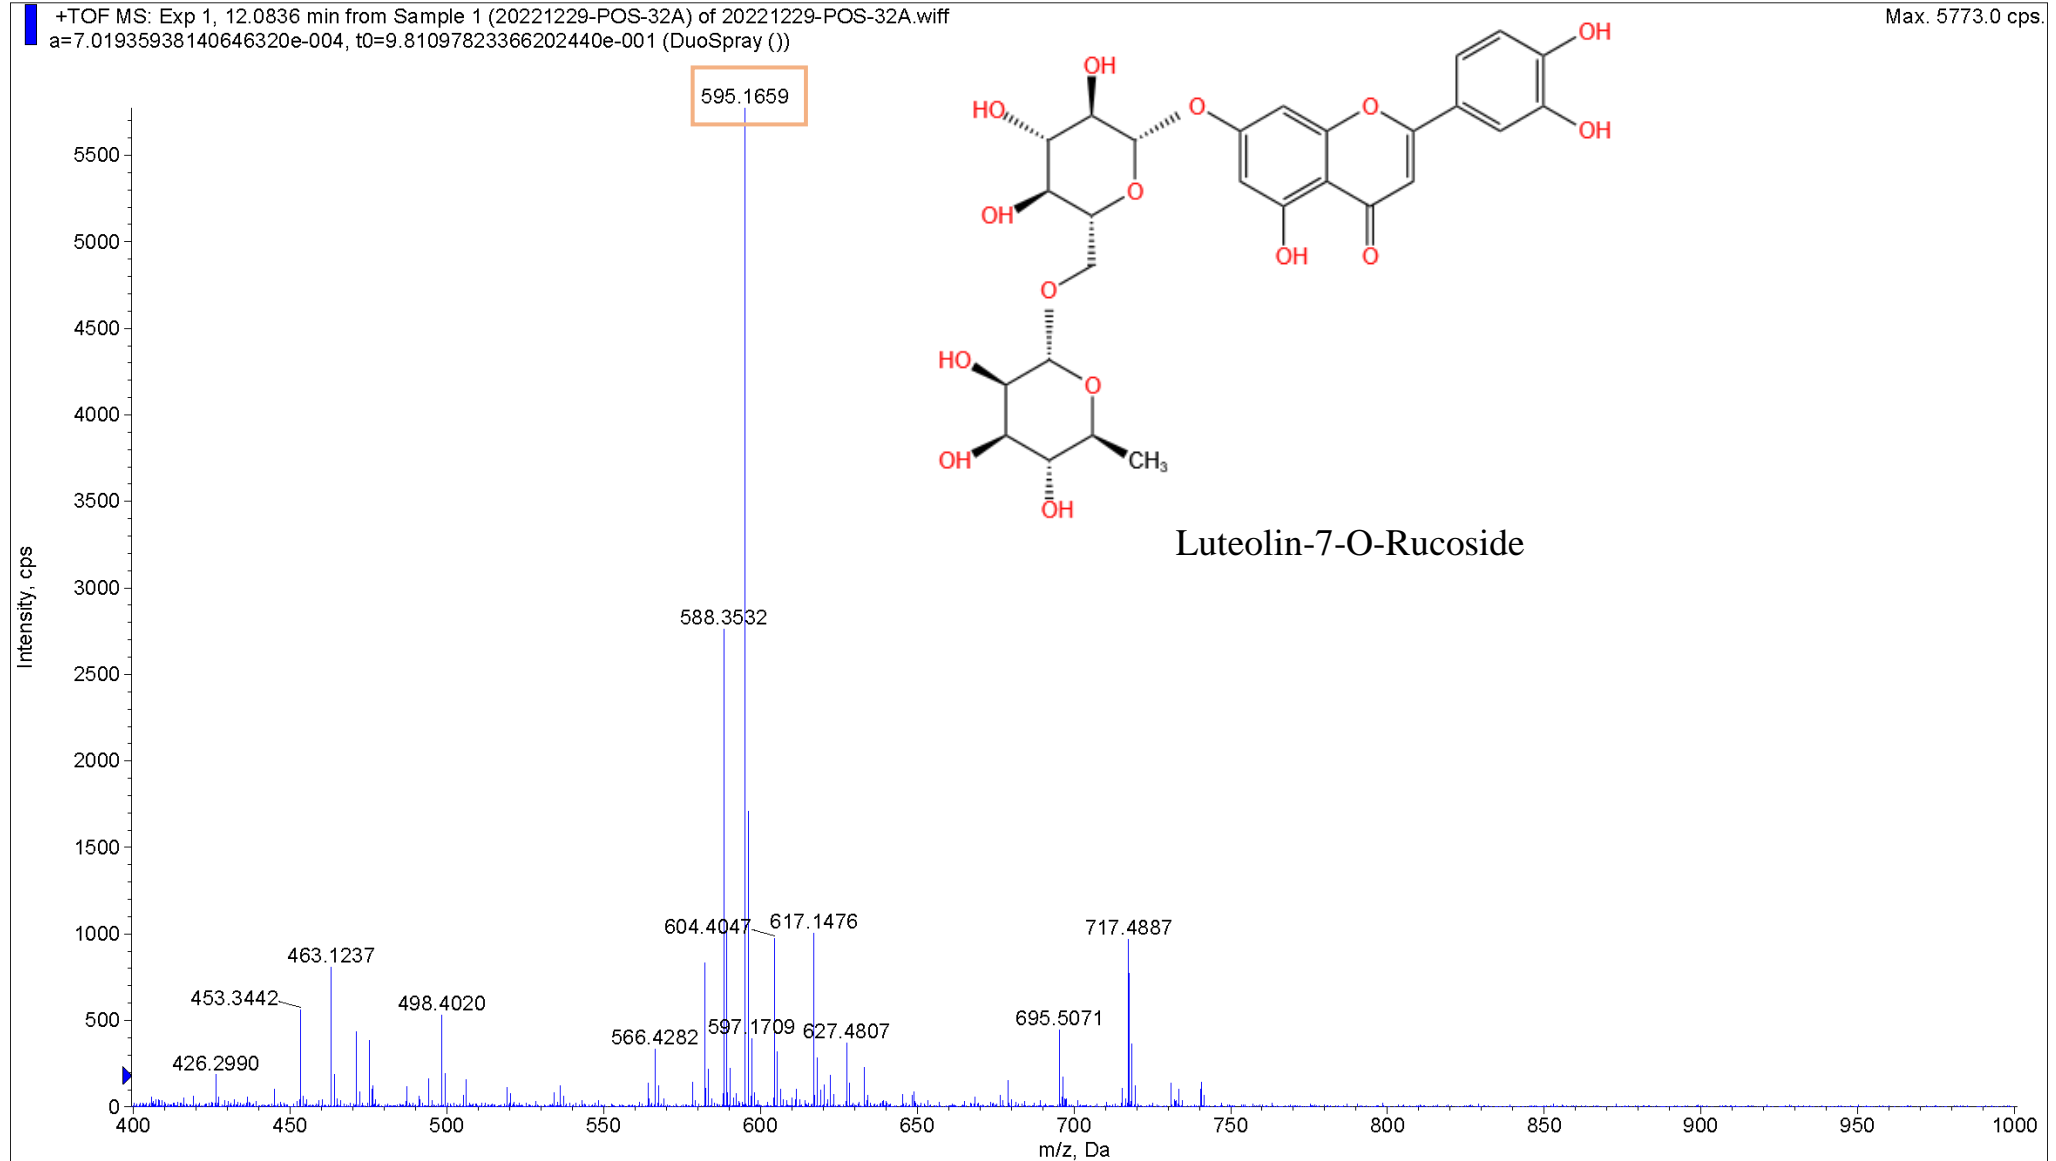

+TOF MS: Exp 1, 20.5983 min from Sample 1 (20221229-POS-32A) of 20221229-POS-32A.wiff  
a=7.01935809864076620e-004, t0=9.78813400165637120e-001 (DuoSpray ())

Max. 3696.0 cps.

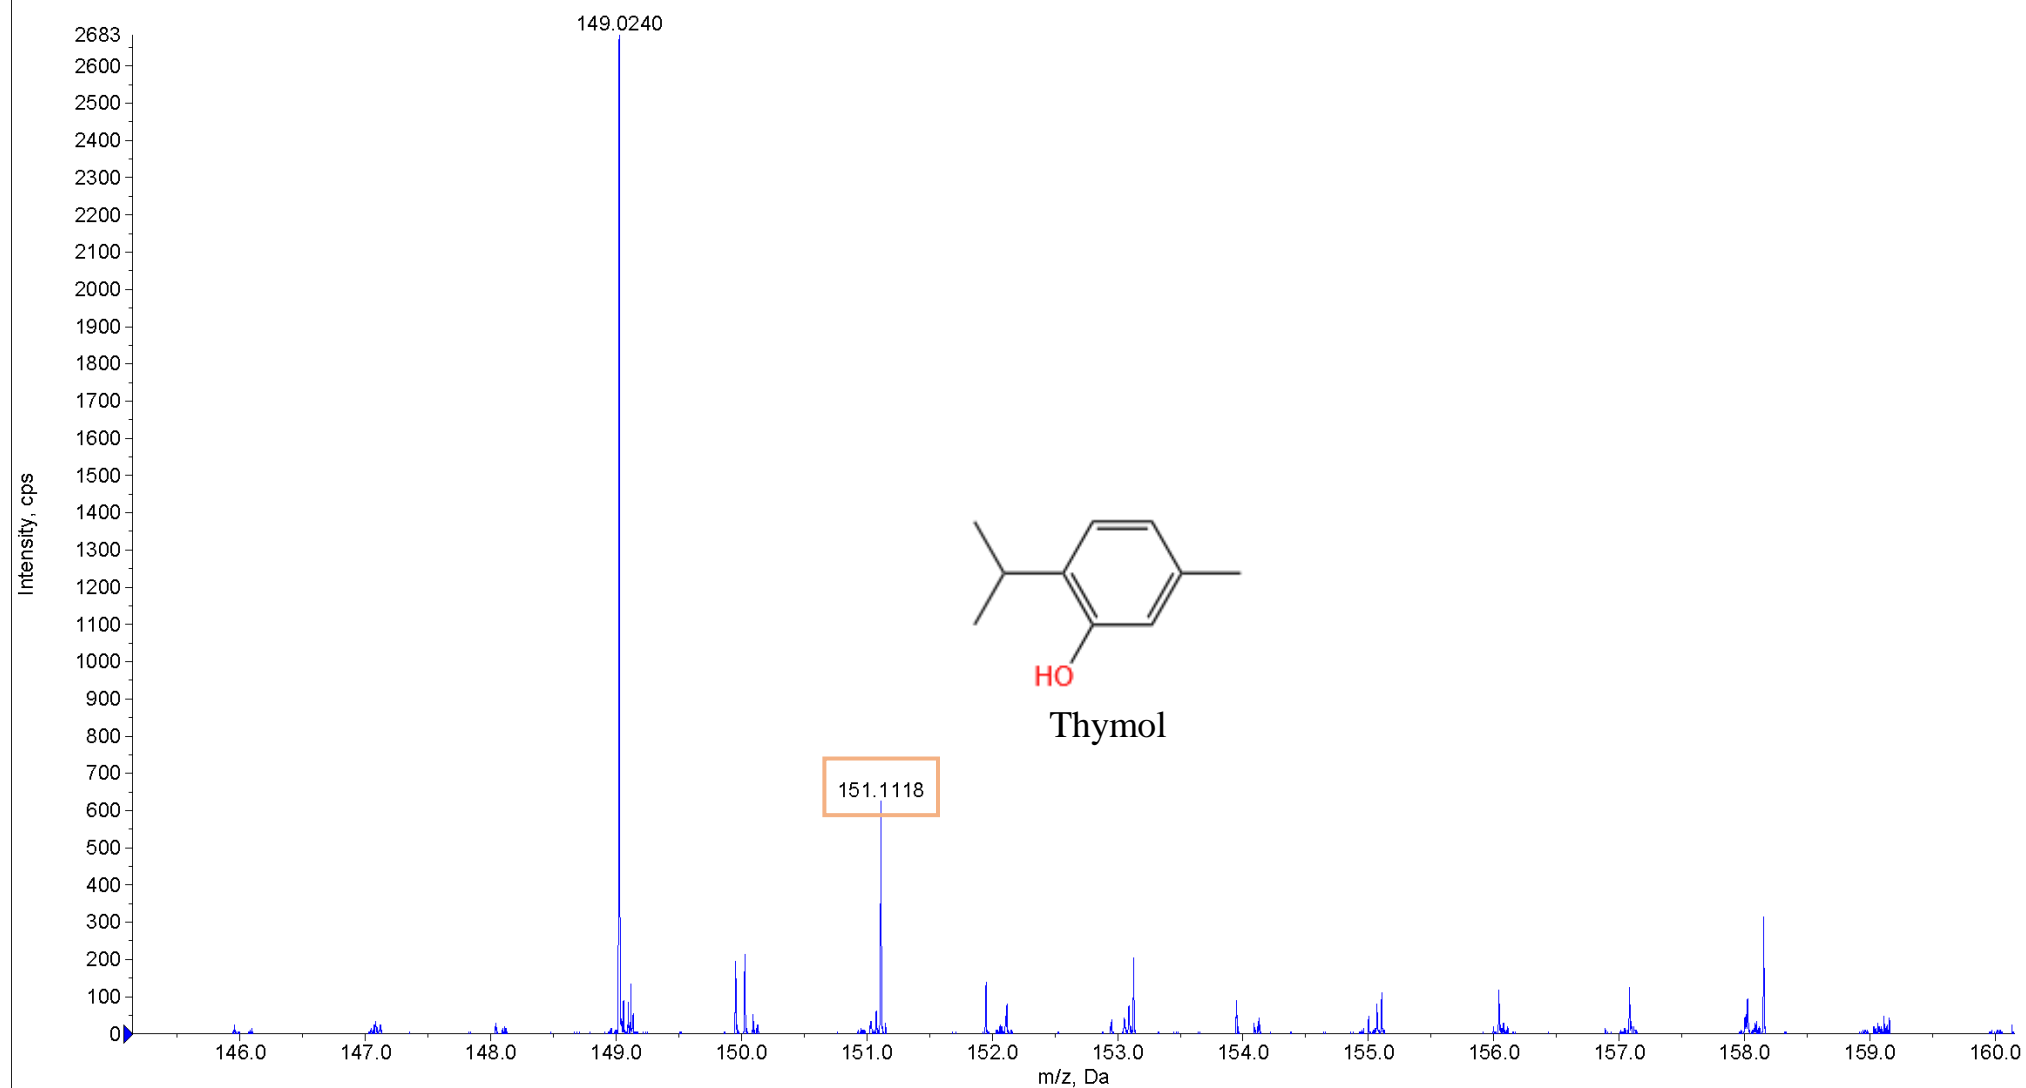

+TOF MS: Exp 1, 19.5206 min from Sample 1 (20221229-POS-32A) of 20221229-POS-32A.wiff  
a=7.01936126420392500e-004, t0=9.78287355092807400e-001 (DuoSpray ())

Max. 4082.0 cps.

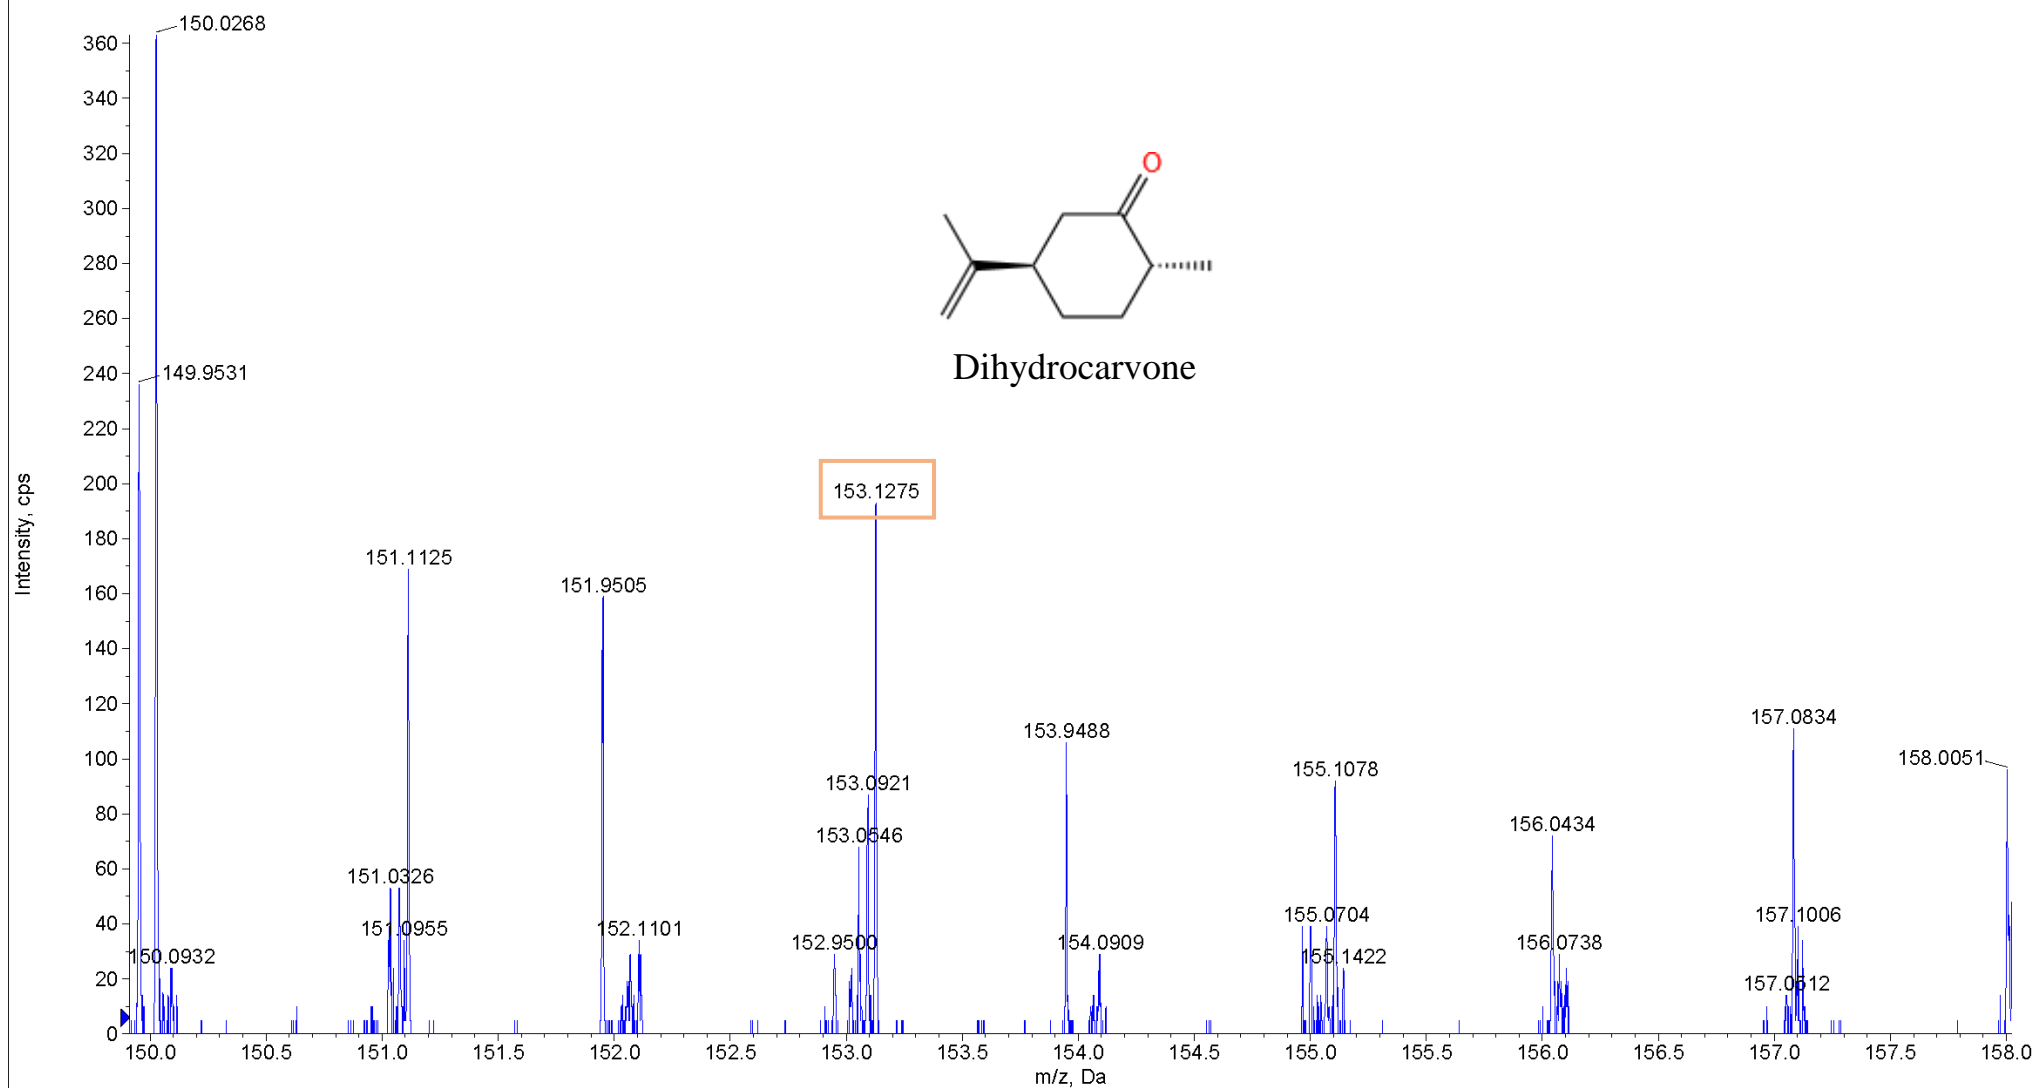

+TOF MS: Exp 1, 17.2206 min from Sample 1 (20221229-POS-32A) of 20221229-POS-32A.wiff  
a=7.01935080310749580e-004, t0=9.52907769829852370e-001 (DuoSpray ())

Max. 2790.0 cps.

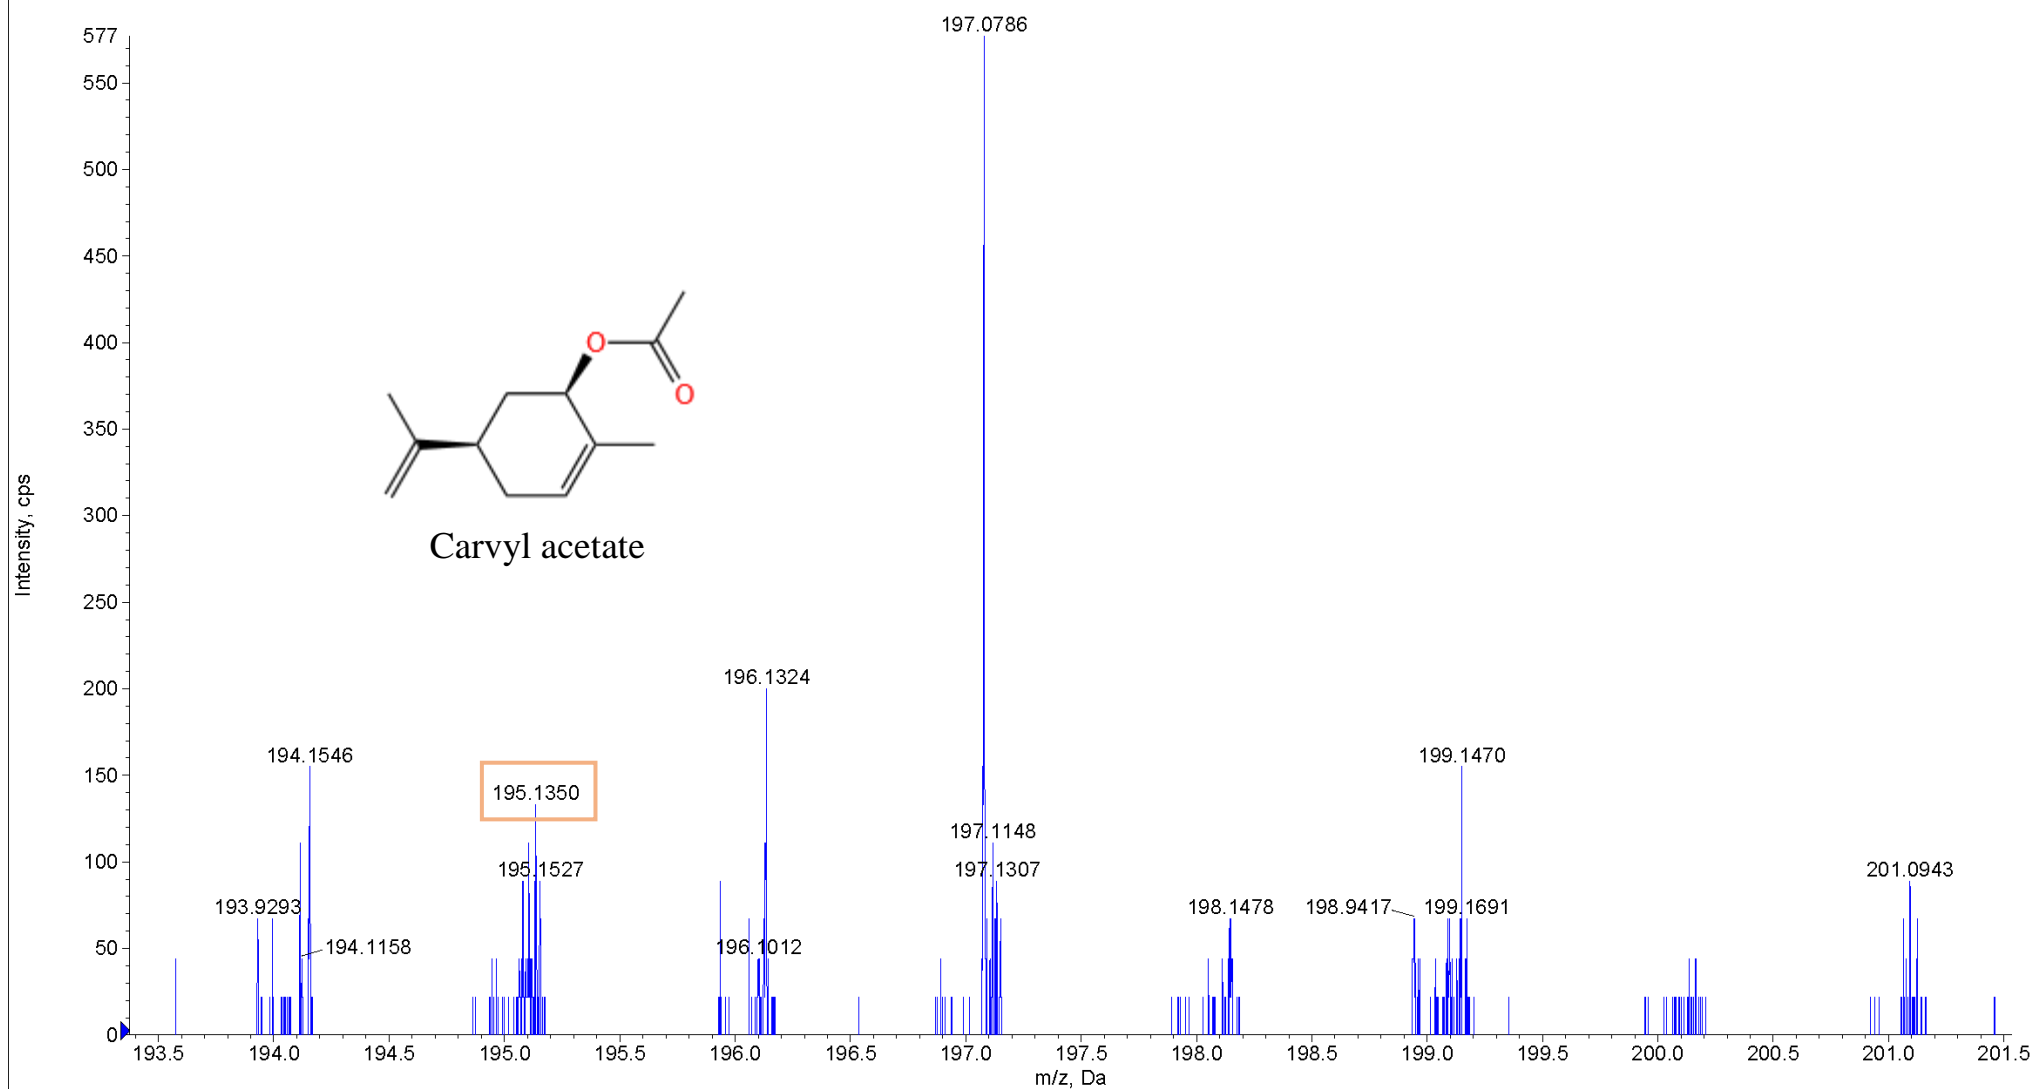



+TOF MS: Exp 1, 27.9822 to 27.9983 min from Sample 1 (20221229-POS-32A) of 20221229-POS-32A.wiff different calibrations (DuoSpray ())

Max. 3.8e5 cps.

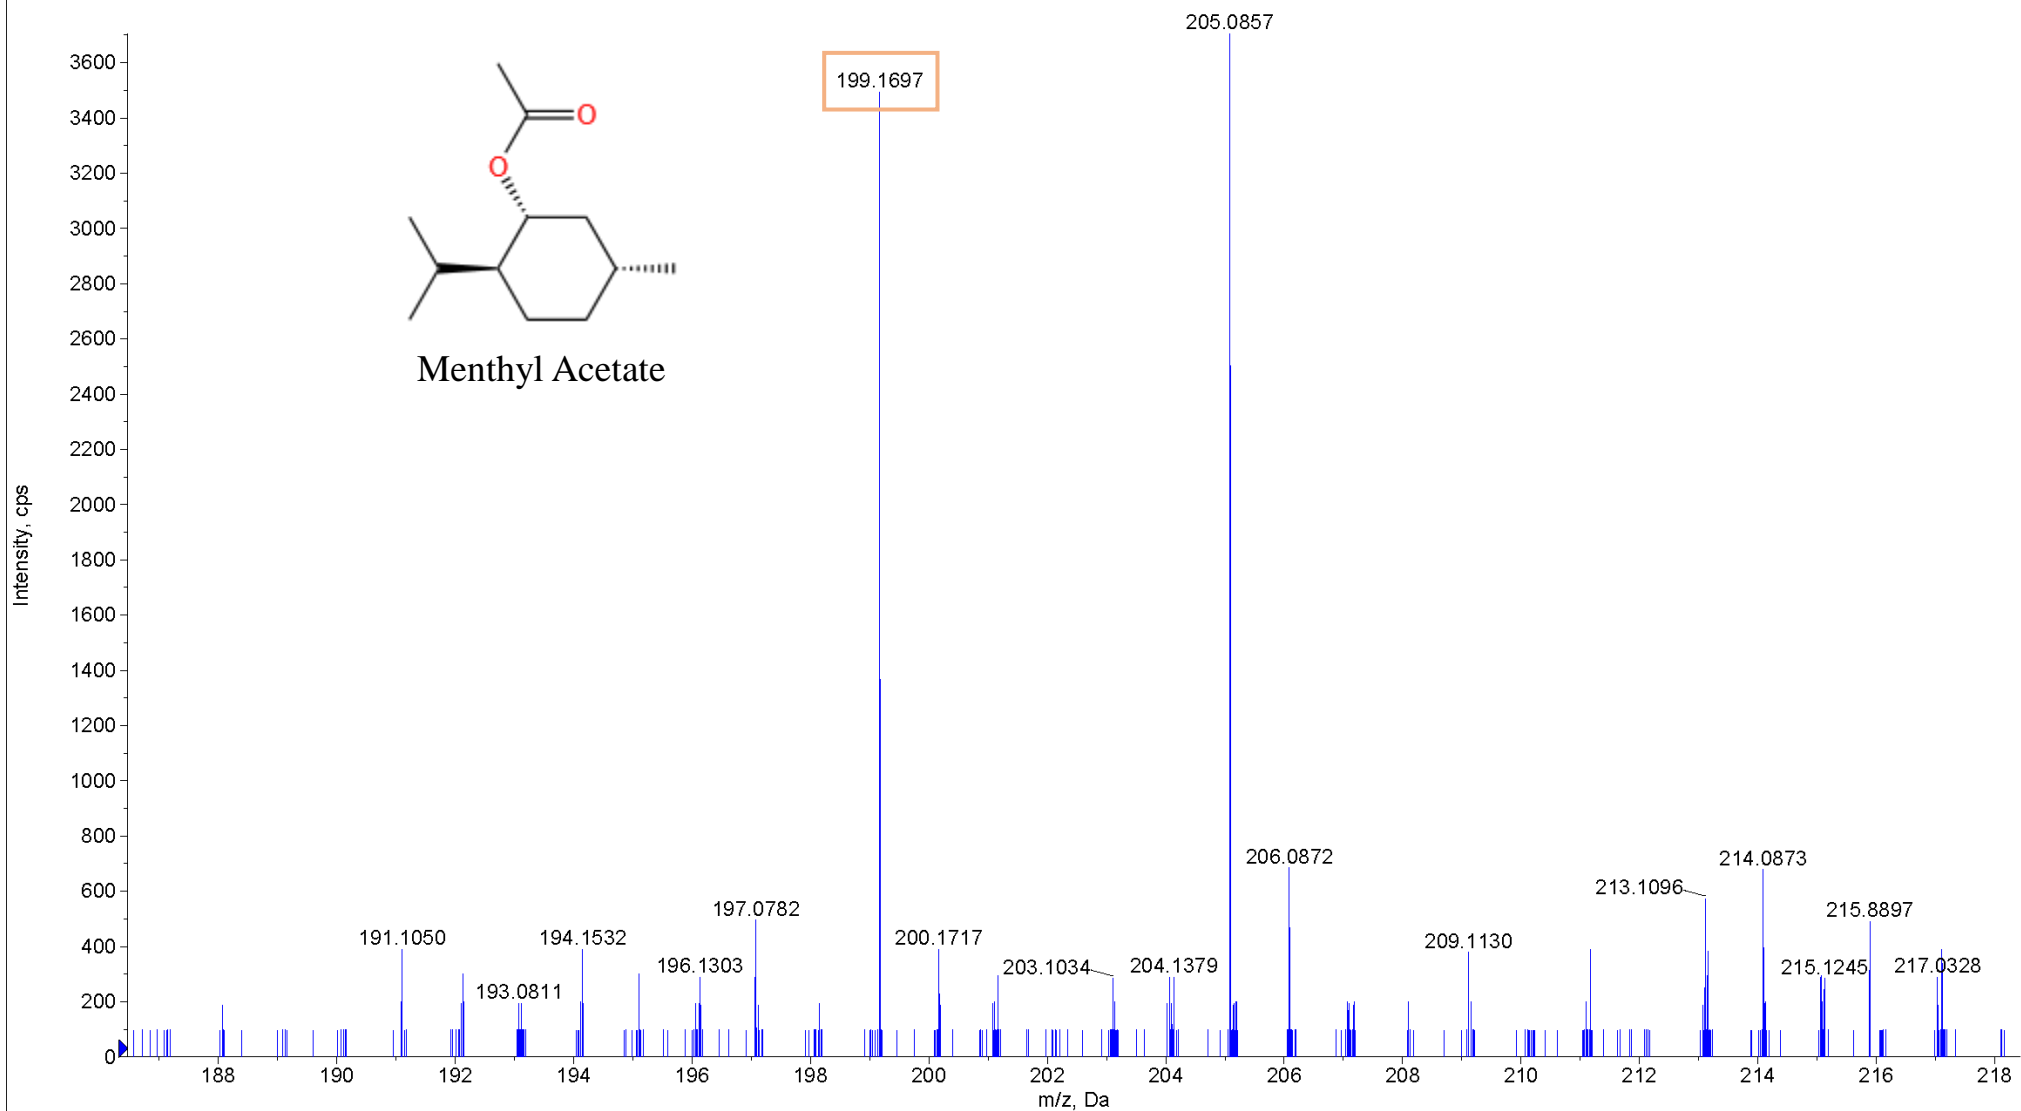

+TOF MS: Exp 1, 1.3598 min from Sample 1 (20221229-POS-32A) of 20221229-POS-32A.wiff  
a=7.01936327903755700e-004, t0=9.83699428989459830e-001 (DuoSpray ())

Max. 1.5e6 cps.

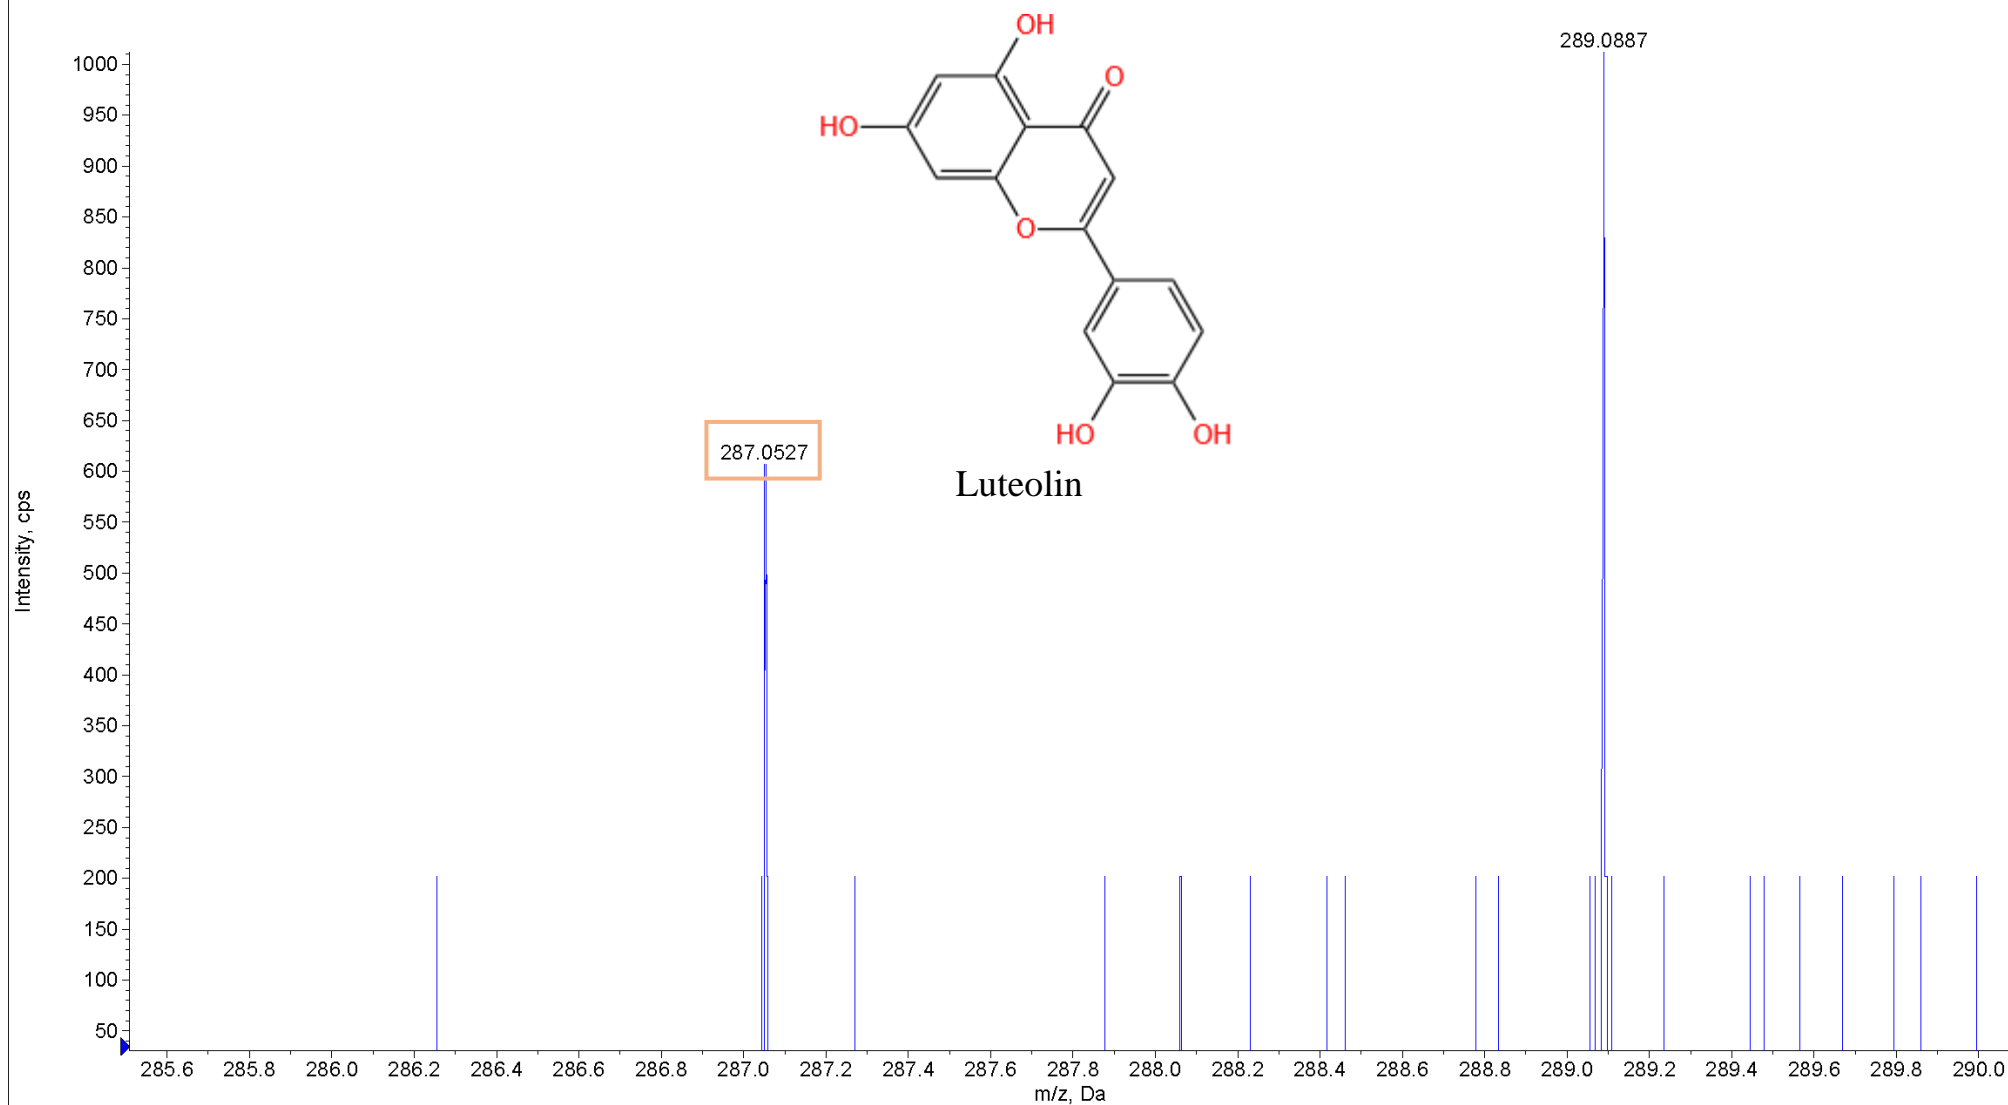

+TOF MS: Exp 1, 21.1916 min from Sample 1 (20221229-POS-32A) of 20221229-POS-32A.wiff  
a=7.01935687536481950e-004, t0=9.72969564400305580e-001 (DuoSpray ())

Max. 6564.0 cps.

Intensity, cps

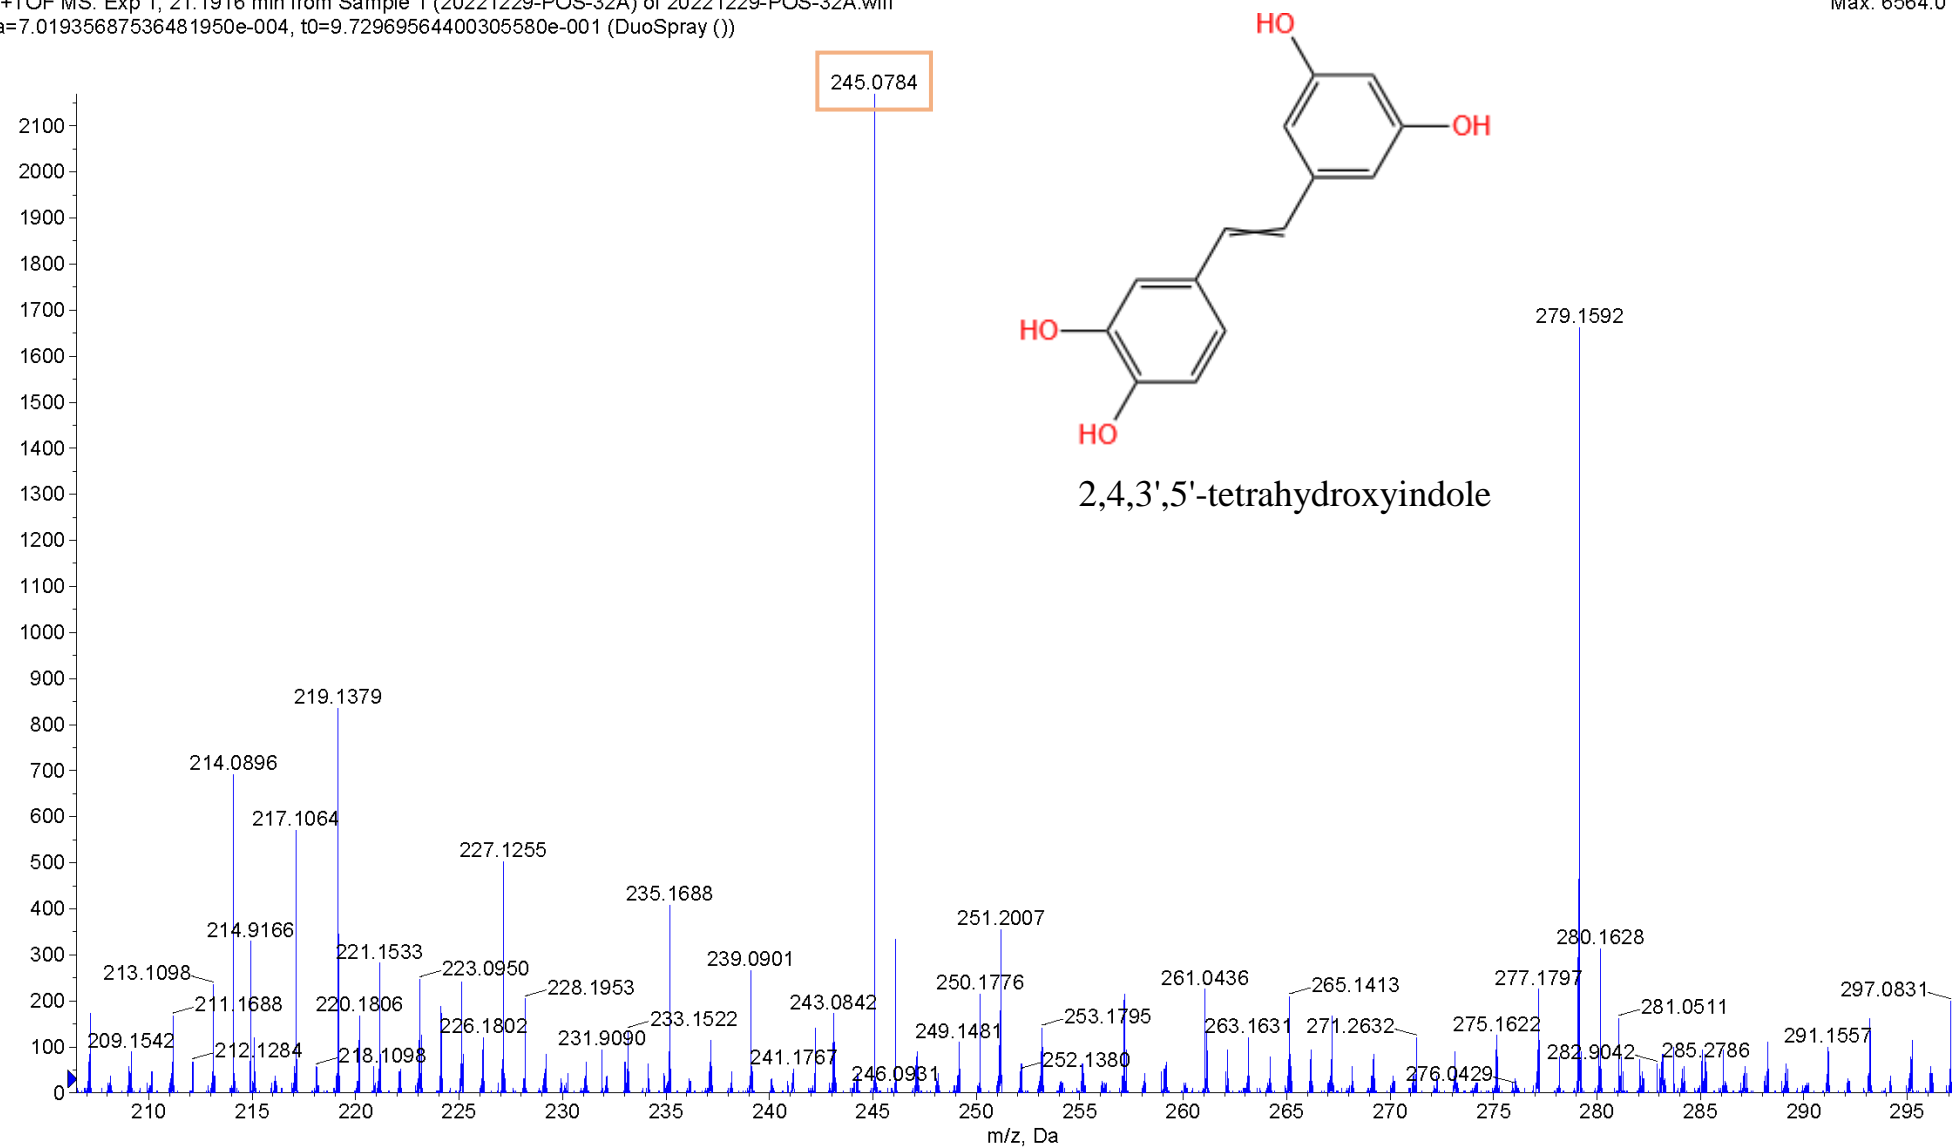

+TOF MS: Exp 1, 1.1192 min from Sample 1 (20221229-POS-32A) of 20221229-POS-32A.wiff  
a=7.01935596381019110e-004, t0=9.85772119846443750e-001 (DuoSpray ())

Max. 2.4e6 cps.

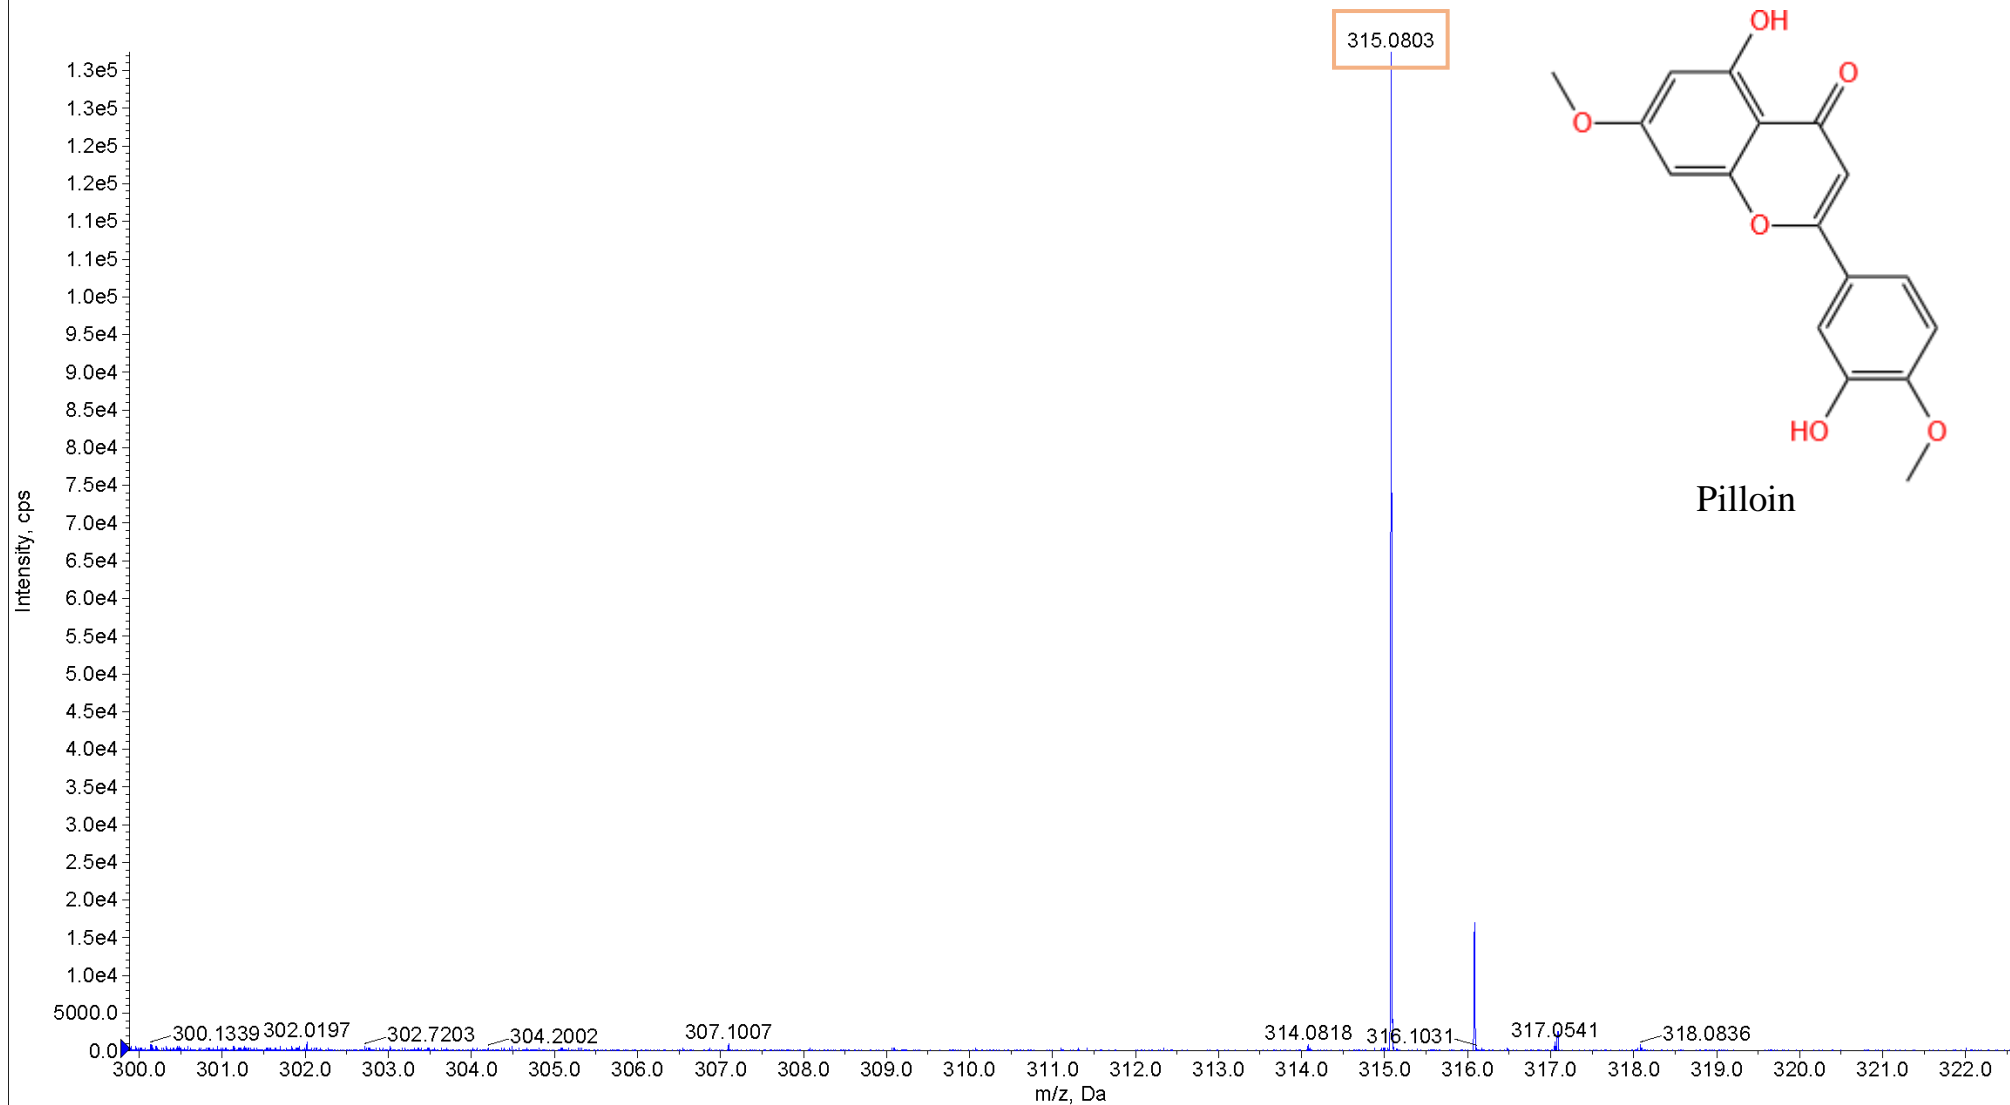

+TOF MS: Exp 1, 28.3317 min from Sample 1 (20221229-POS-32A) of 20221229-POS-32A.wiff  
a=7.01935945878287470e-004, t0=9.31824278175484300e-001 (DuoSpray ())

Max. 4.8e5 cps.

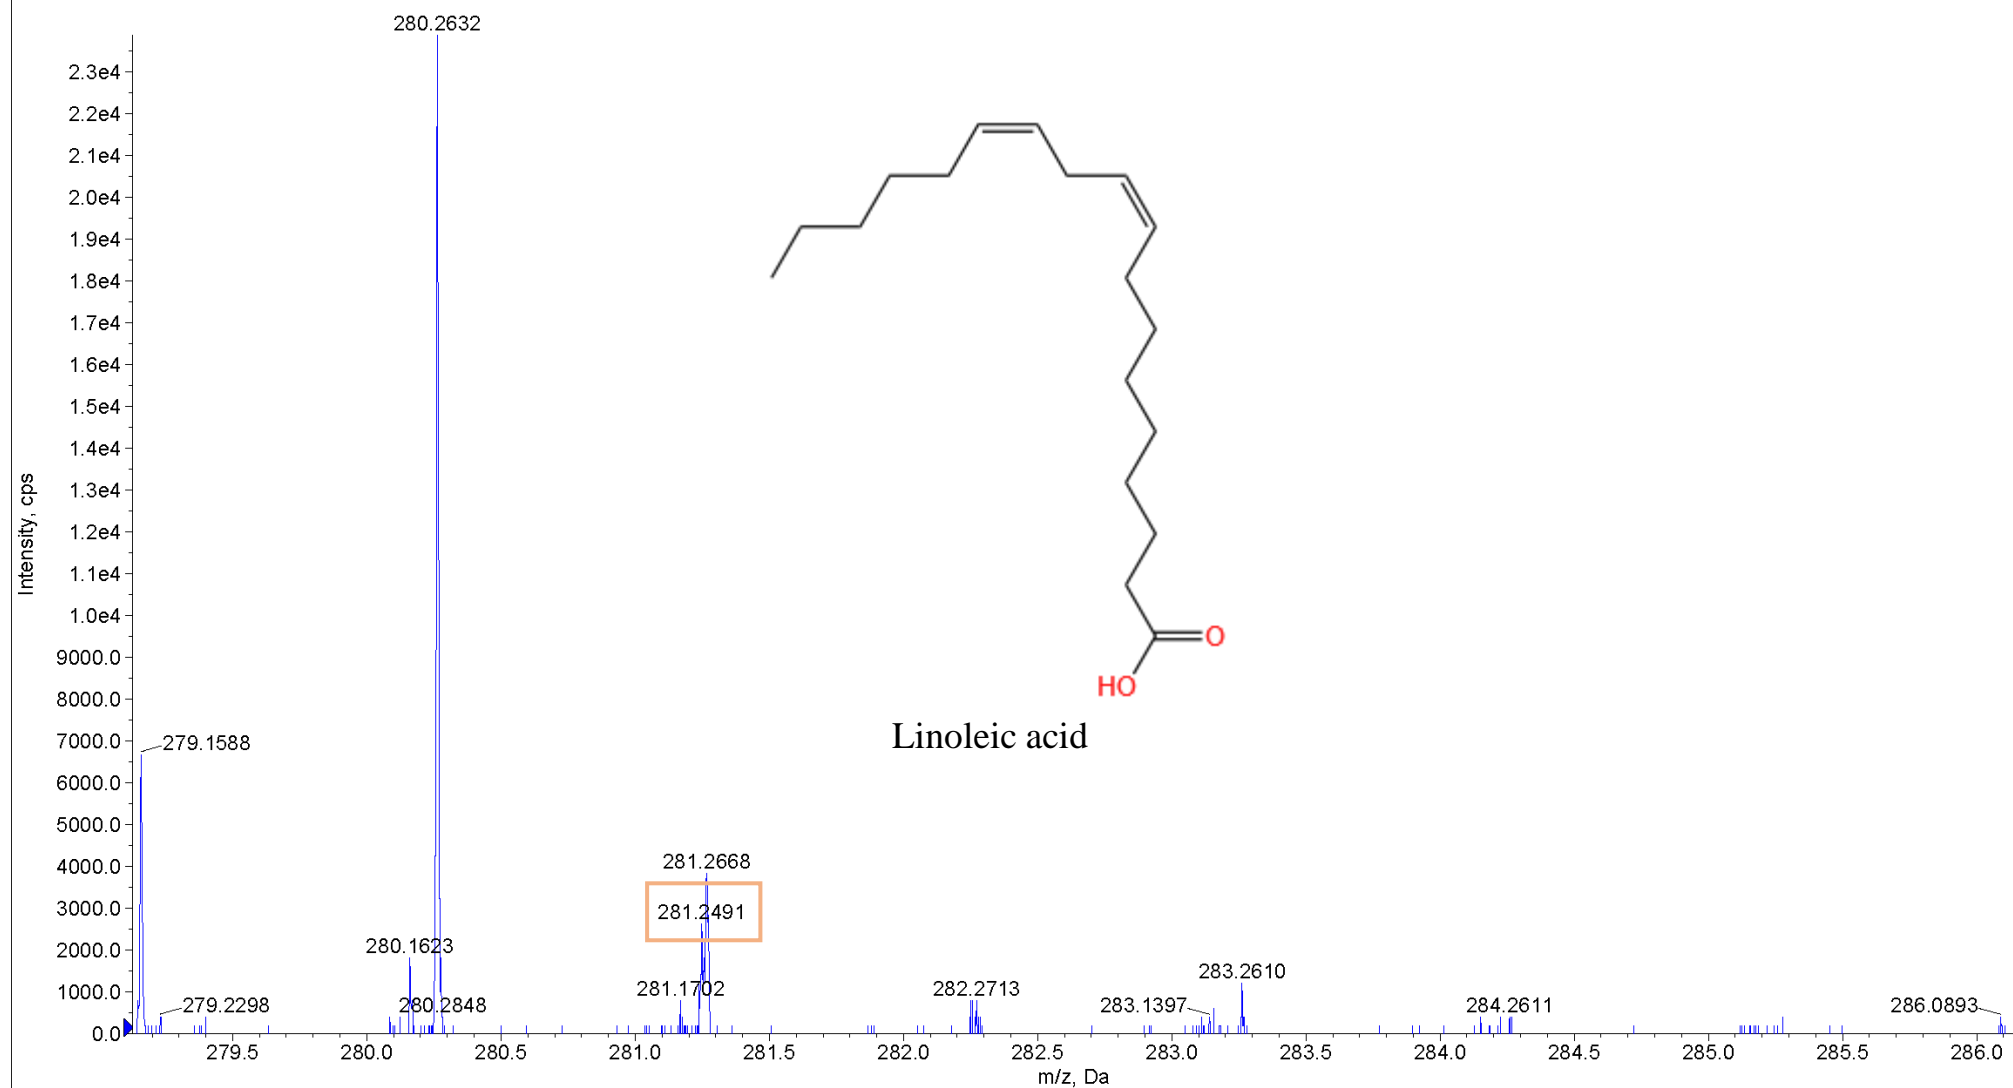

+TOF MS: Exp 1, 12.7591 min from Sample 1 (20221229-POS-32A) of 20221229-POS-32A.wiff  
a=7.01936246920463250e-004, t0=9.81217870078681780e-001 (DuoSpray ())

Max. 3.3e4 cps.

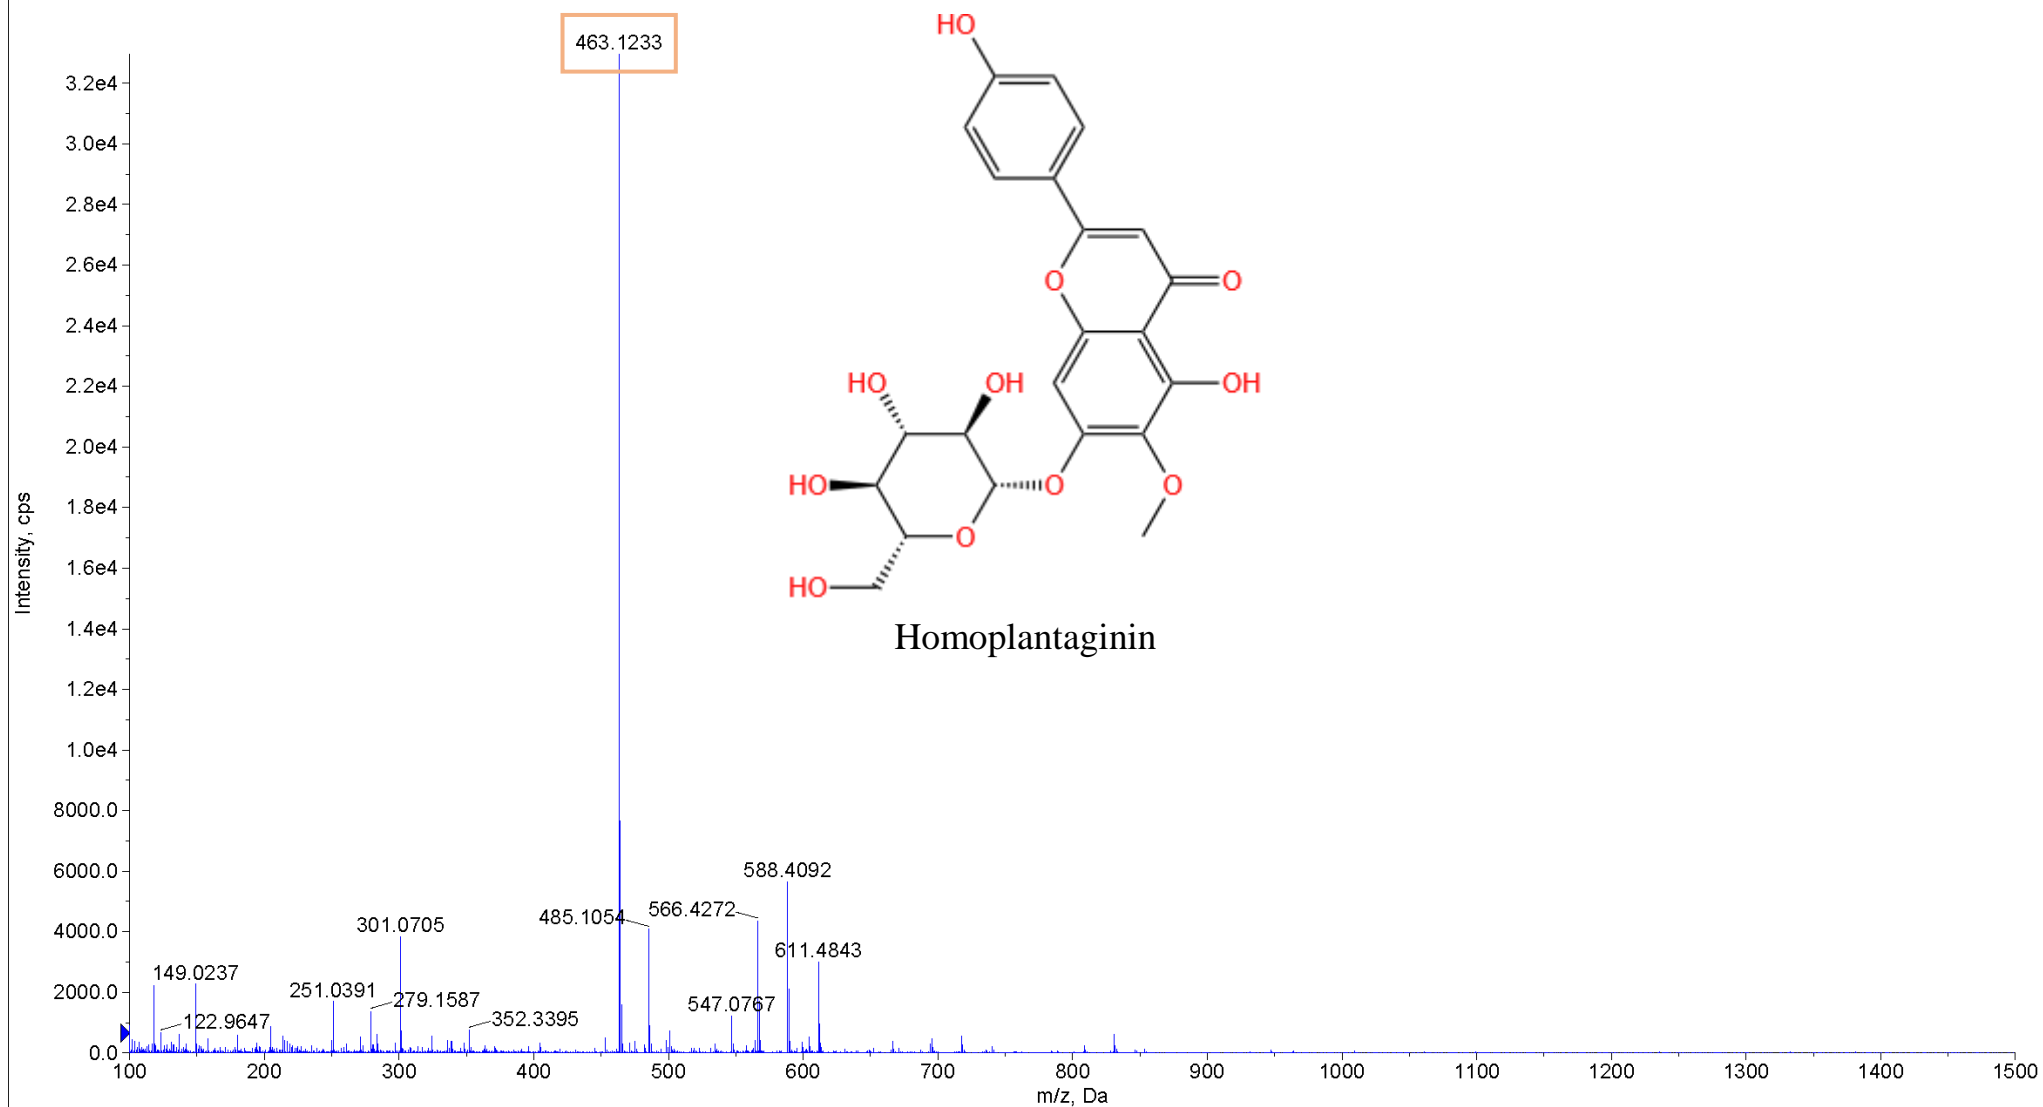

+TOF MS: Exp 1, 23.7246 min from Sample 1 (20221229-POS-32A) of 20221229-POS-32A.wiff  
a=7.01934661497613170e-004, t0=9.32097330949919310e-001 (DuoSpray ())

Max. 3.2e4 cps.

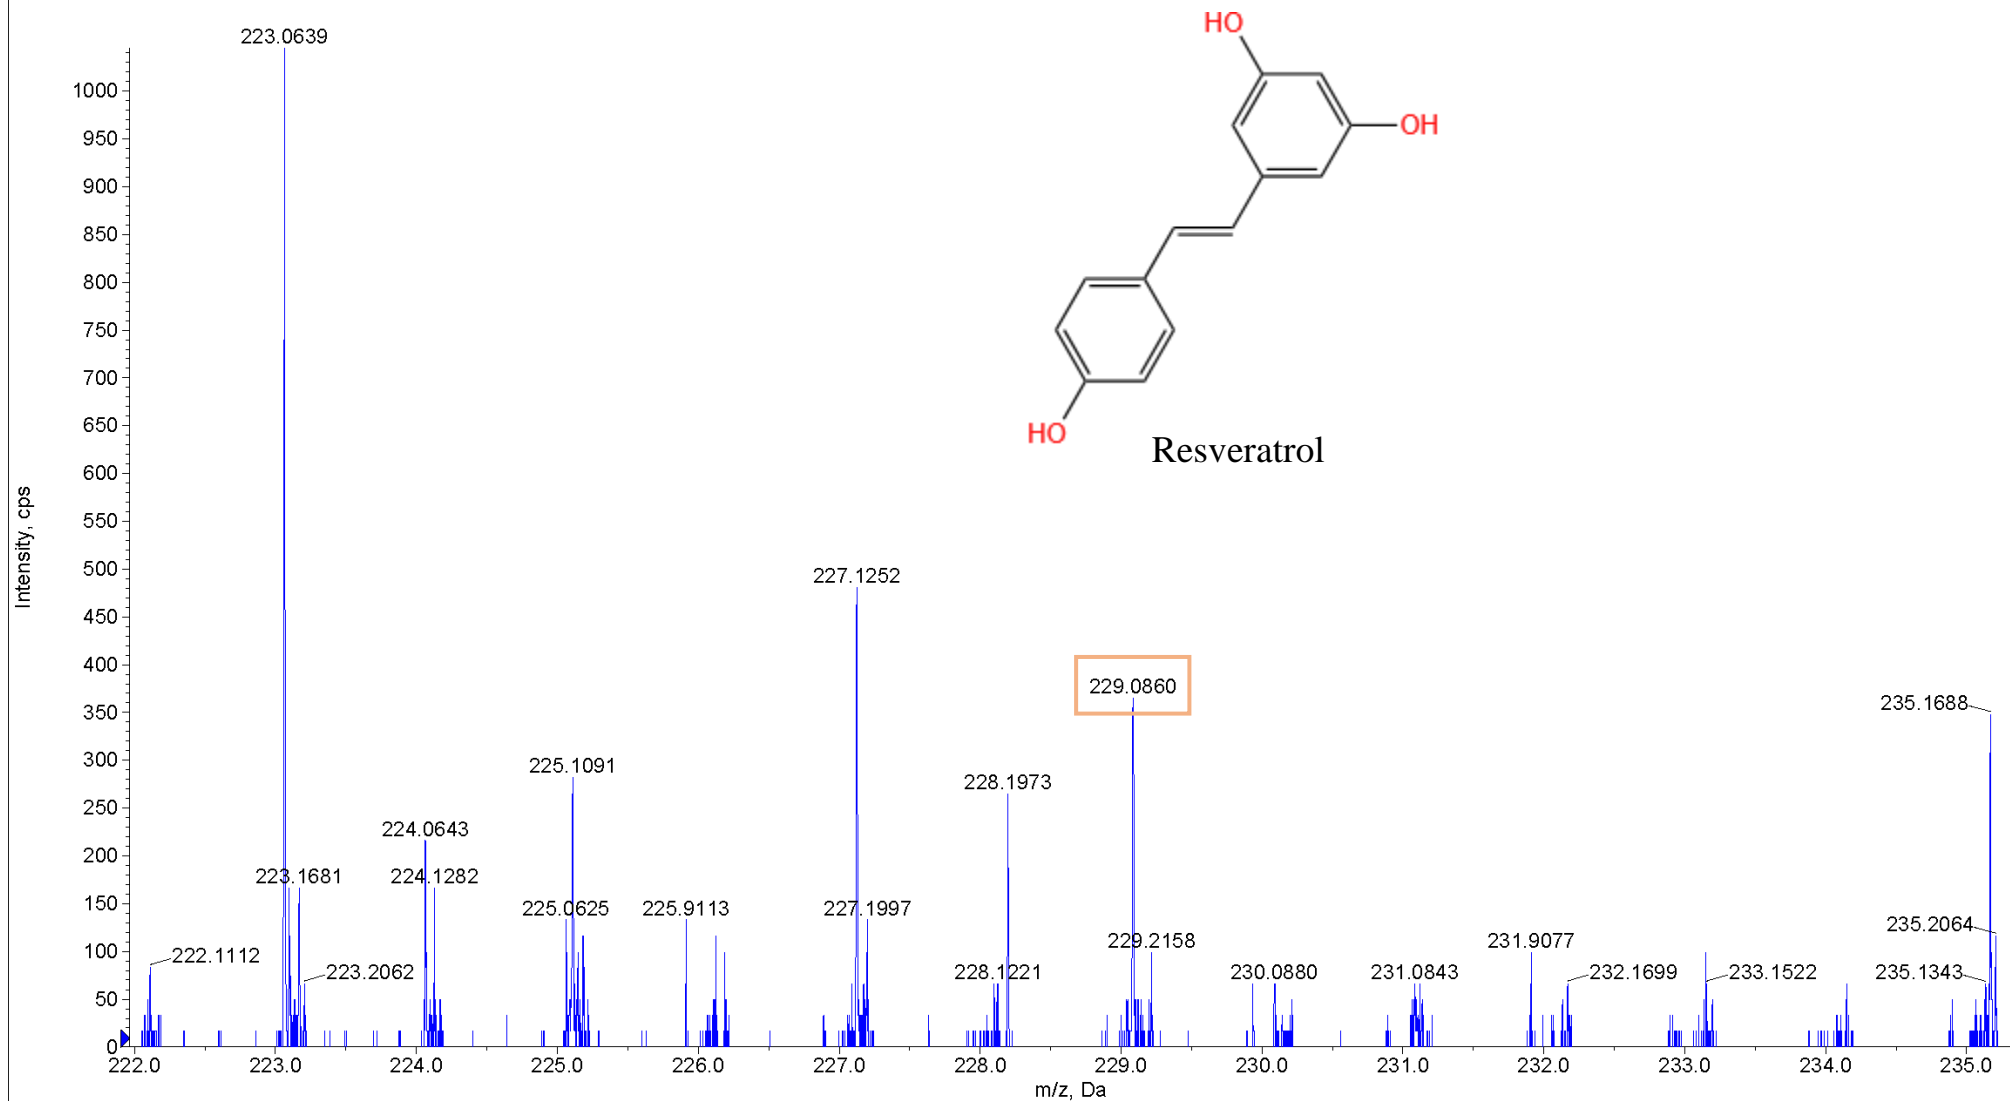

+TOF MS: Exp 1, 12.7591 min from Sample 1 (20221229-POS-32A) of 20221229-POS-32A.wiff  
a=7.01936246920463250e-004, t0=9.81217870078681780e-001 (DuoSpray ())

Max. 3.3e4 cps.

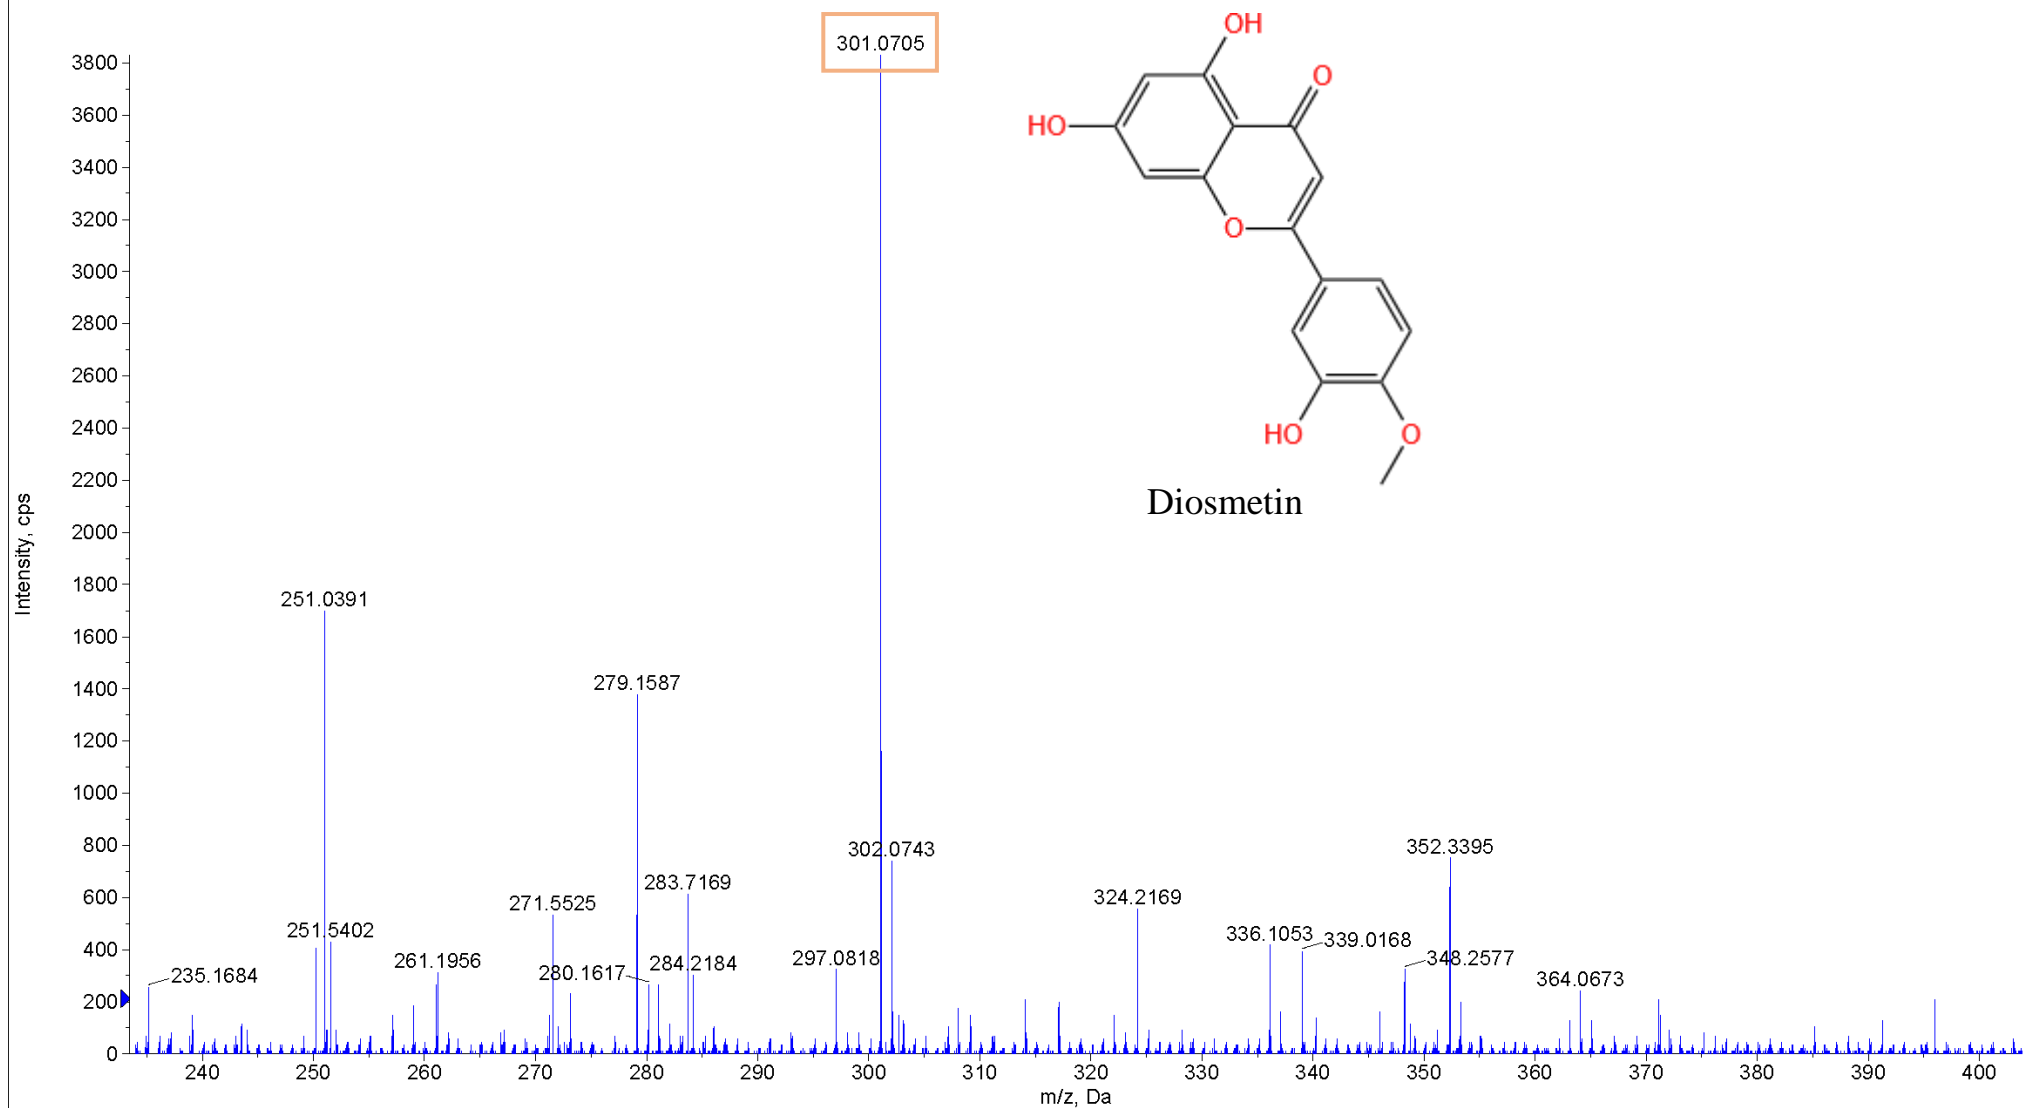



+TOF MS: Exp 1, 27.5534 min from Sample 1 (20221229-POS-32A) of 20221229-POS-32A.wiff  
a=7.01935287479813490e-004, t0=9.33771067061982870e-001 (DuoSpray ())

Max. 2.4e5 cps.

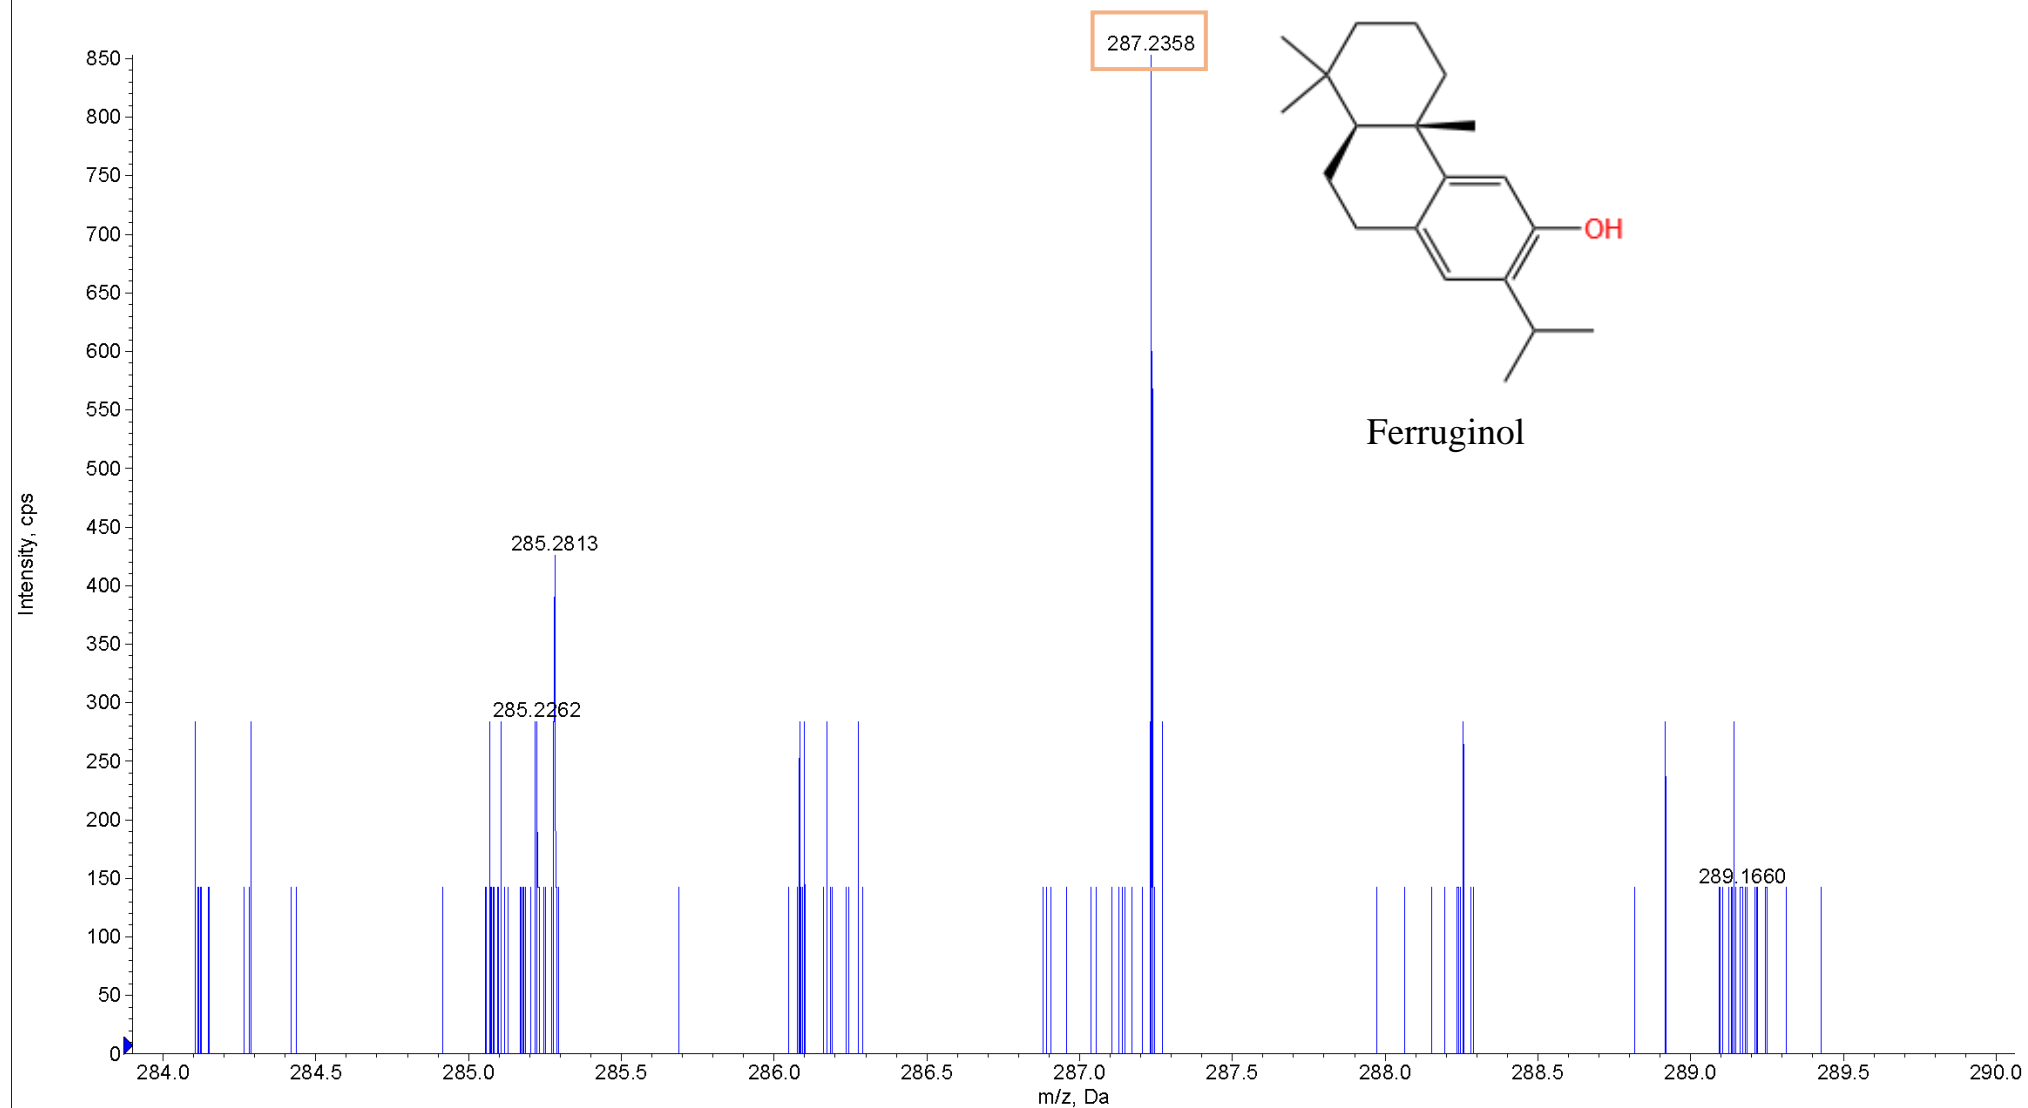

+TOF MS: Exp 1, 18.6694 min from Sample 1 (20221229-POS-32A) of 20221229-POS-32A.wiff  
a=7.01935623684533050e-004, t0=9.68816984729583110e-001 (DuoSpray ())

Max. 2488.0 cps.

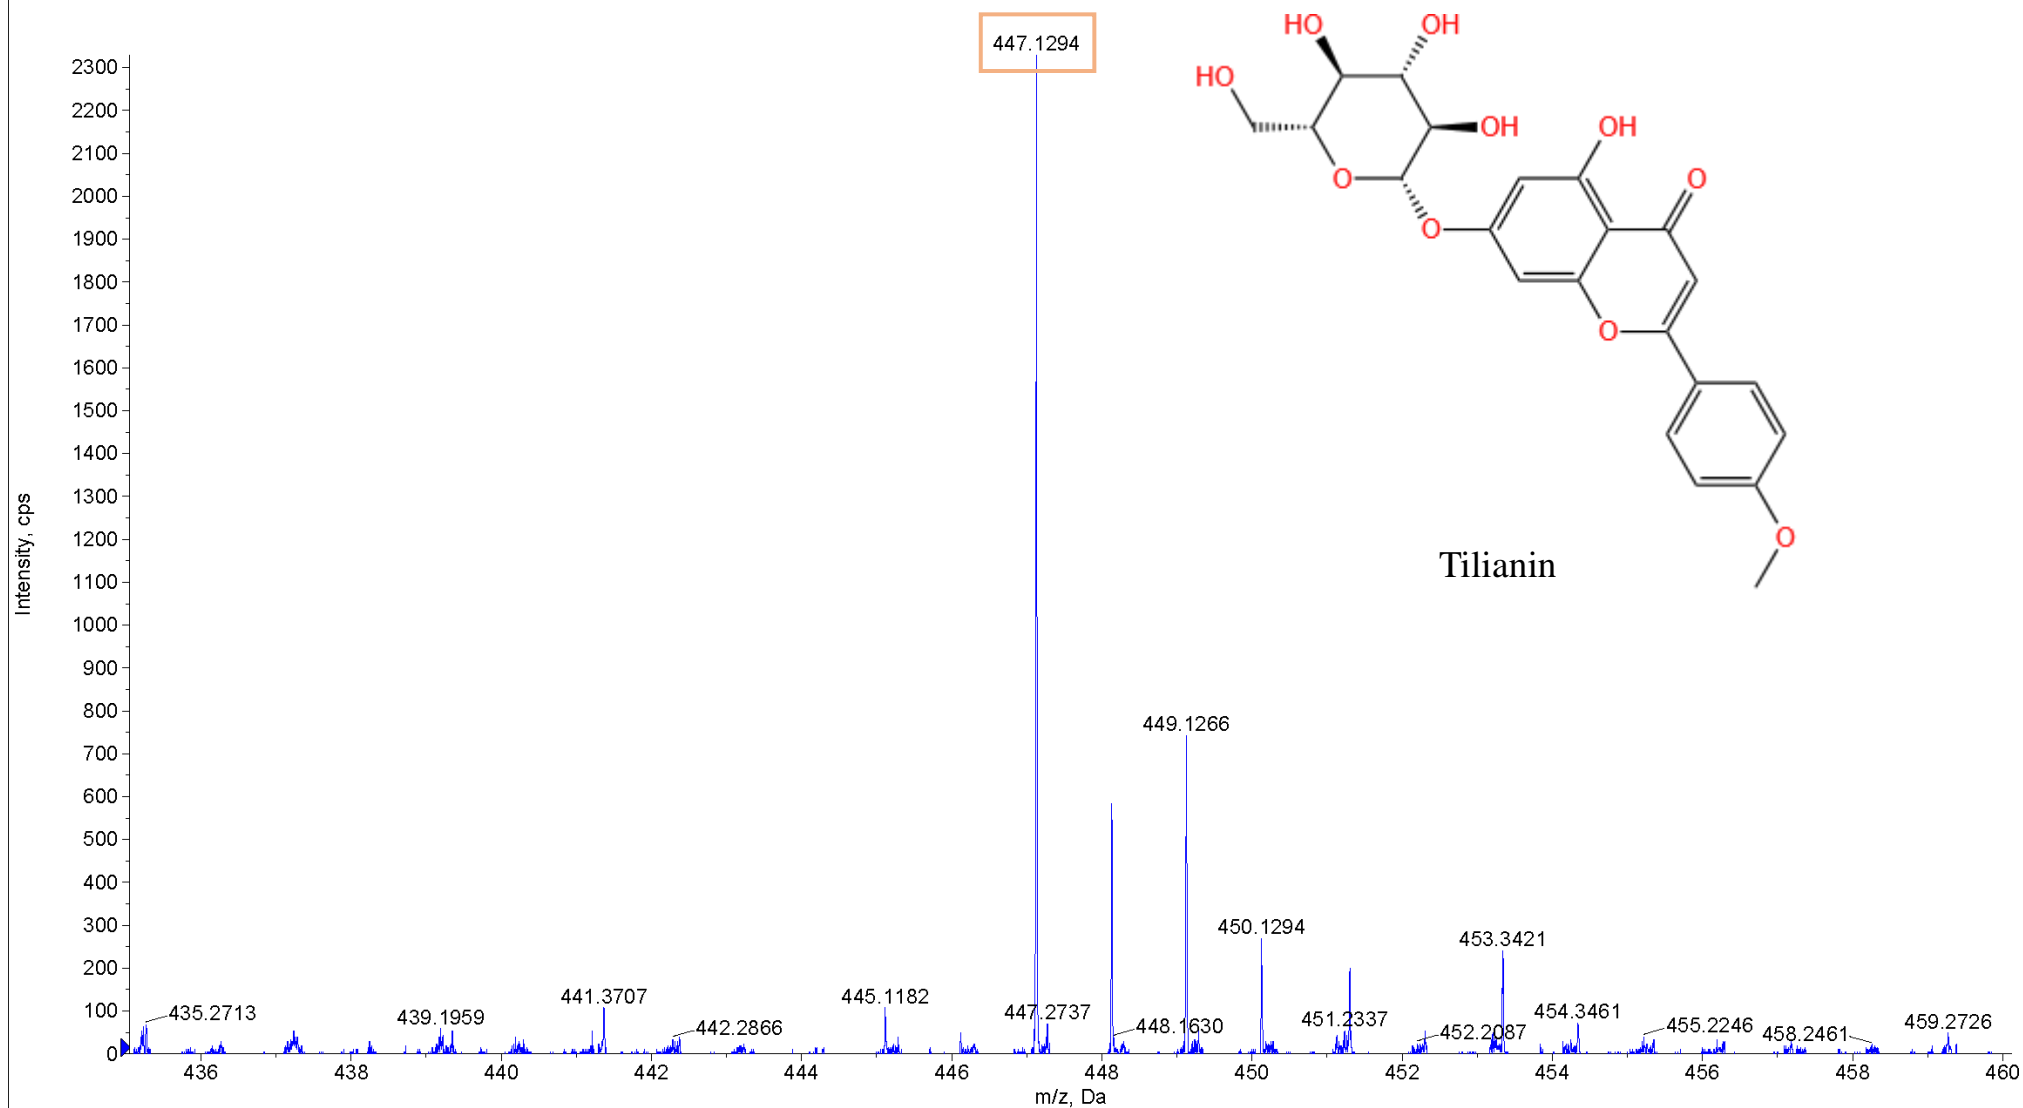

+TOF MS: Exp 1, 12.5930 min from Sample 1 (20221229-POS-32A) of 20221229-POS-32A.wiff  
a=7.01935941640435870e-004, t0=9.77175220038061900e-001 (DuoSpray ())

Max. 9826.0 cps.

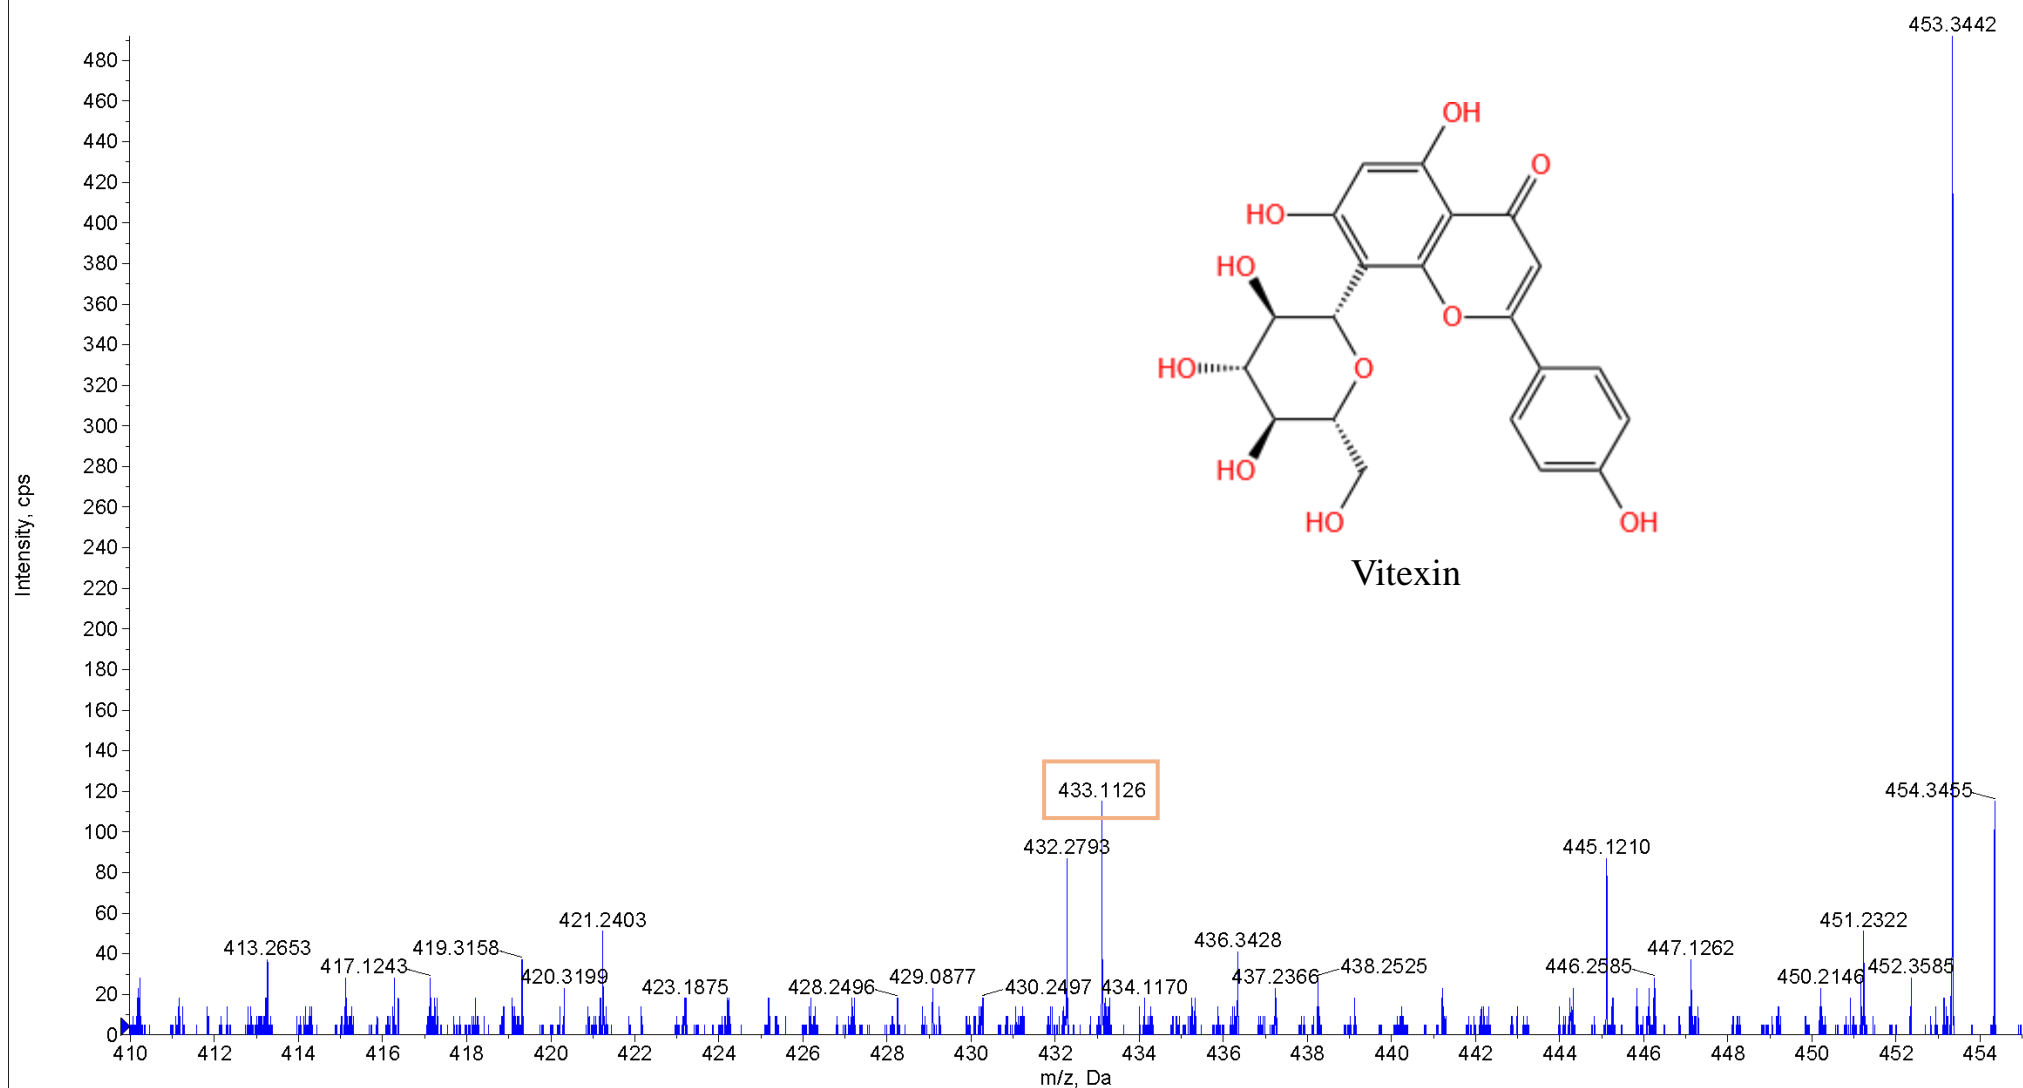

+TOF MS: Exp 1, 10.5437 min from Sample 1 (20221229-POS-32A) of 20221229-POS-32A.wiff  
a=7.01935622876717650e-004, t0=9.75613299058979980e-001 (DuoSpray ())

Max. 2295.0 cps.

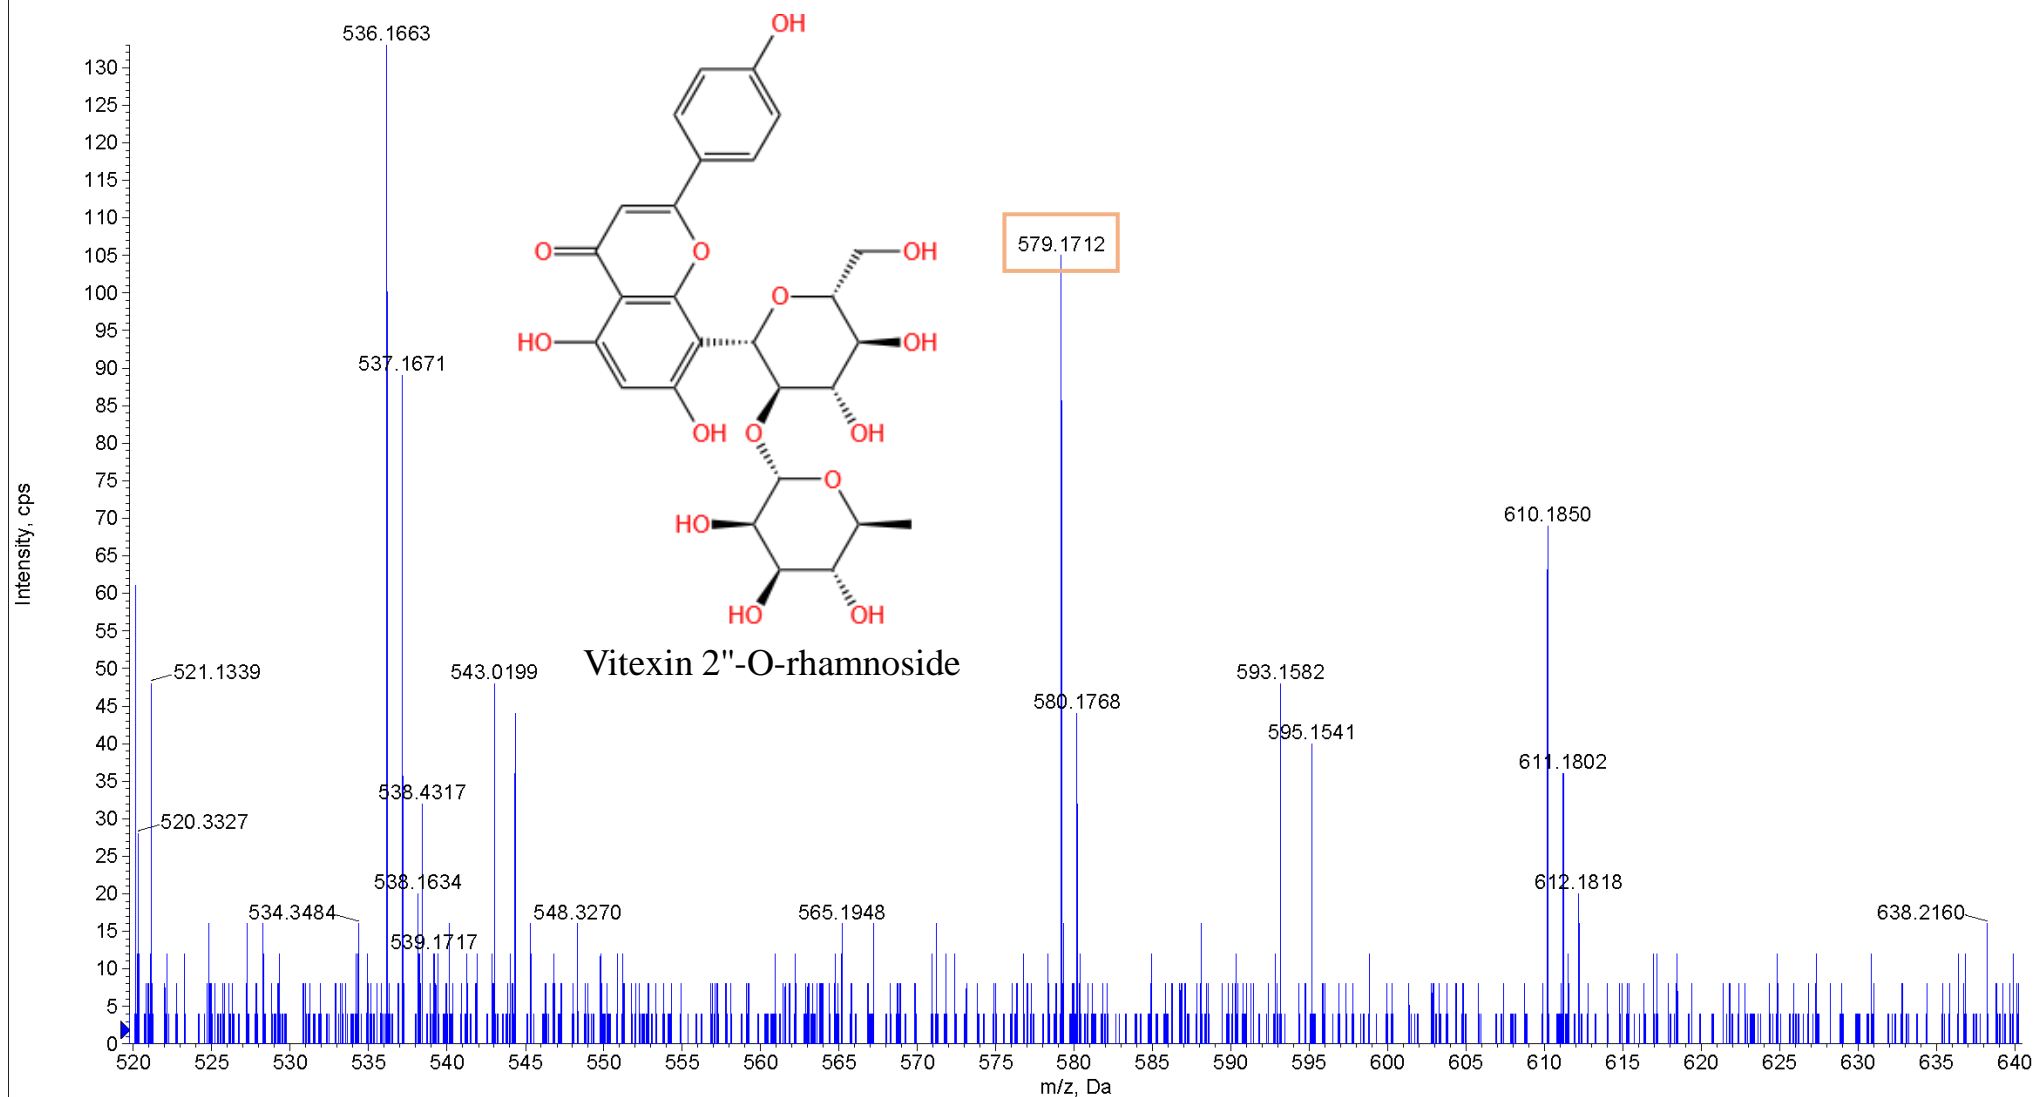

+TOF MS: Exp 1, 12.0836 min from Sample 1 (20221229-POS-32A) of 20221229-POS-32A.wiff  
a=7.01935938140646320e-004, t0=9.81097823366202440e-001 (DuoSpray ())

Max. 5773.0 cps.

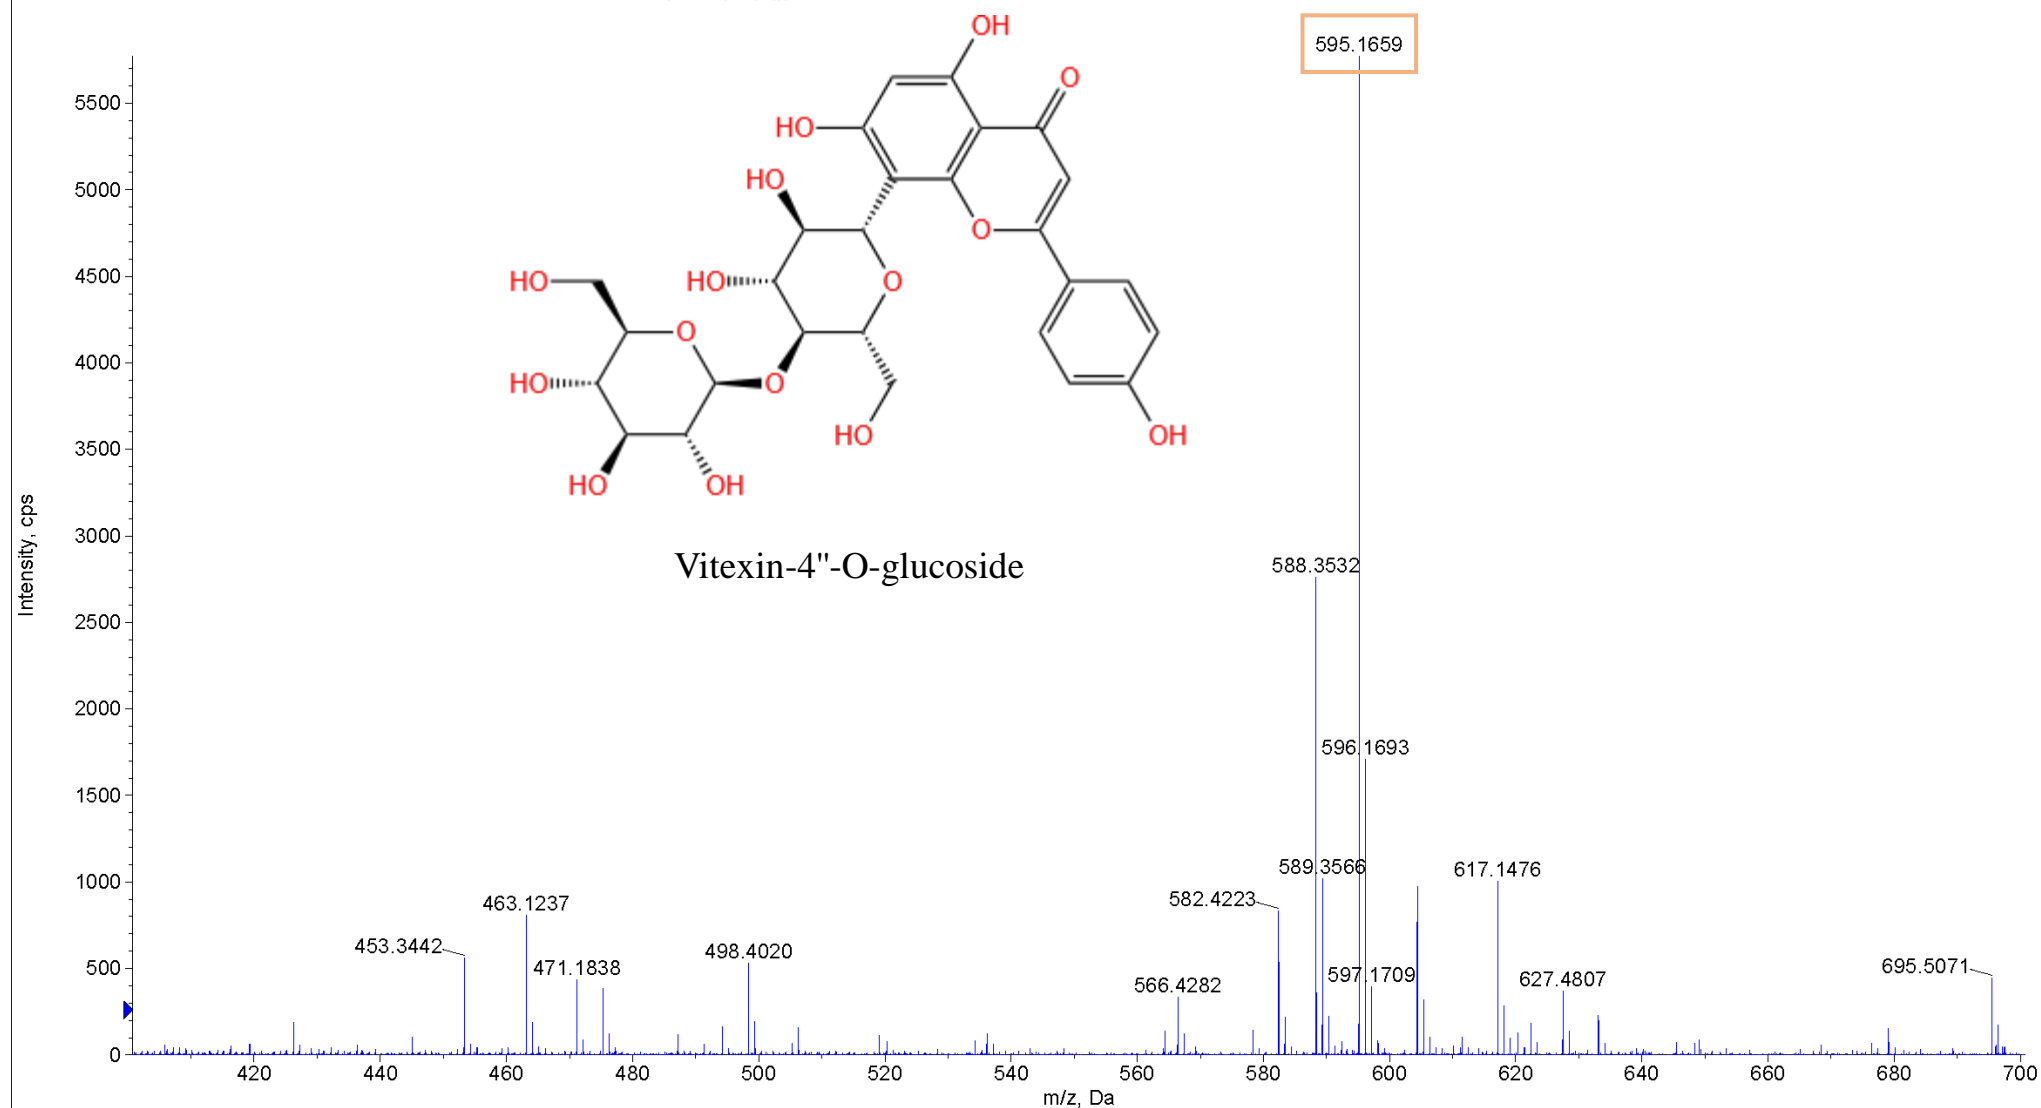

+TOF MS: Exp 1, 13.2908 min from Sample 1 (20221229-POS-32A) of 20221229-POS-32A.wiff  
a=7.01935952763440940e-004, t0=9.73576528601308390e-001 (DuoSpray ())

Max. 2954.0 cps.

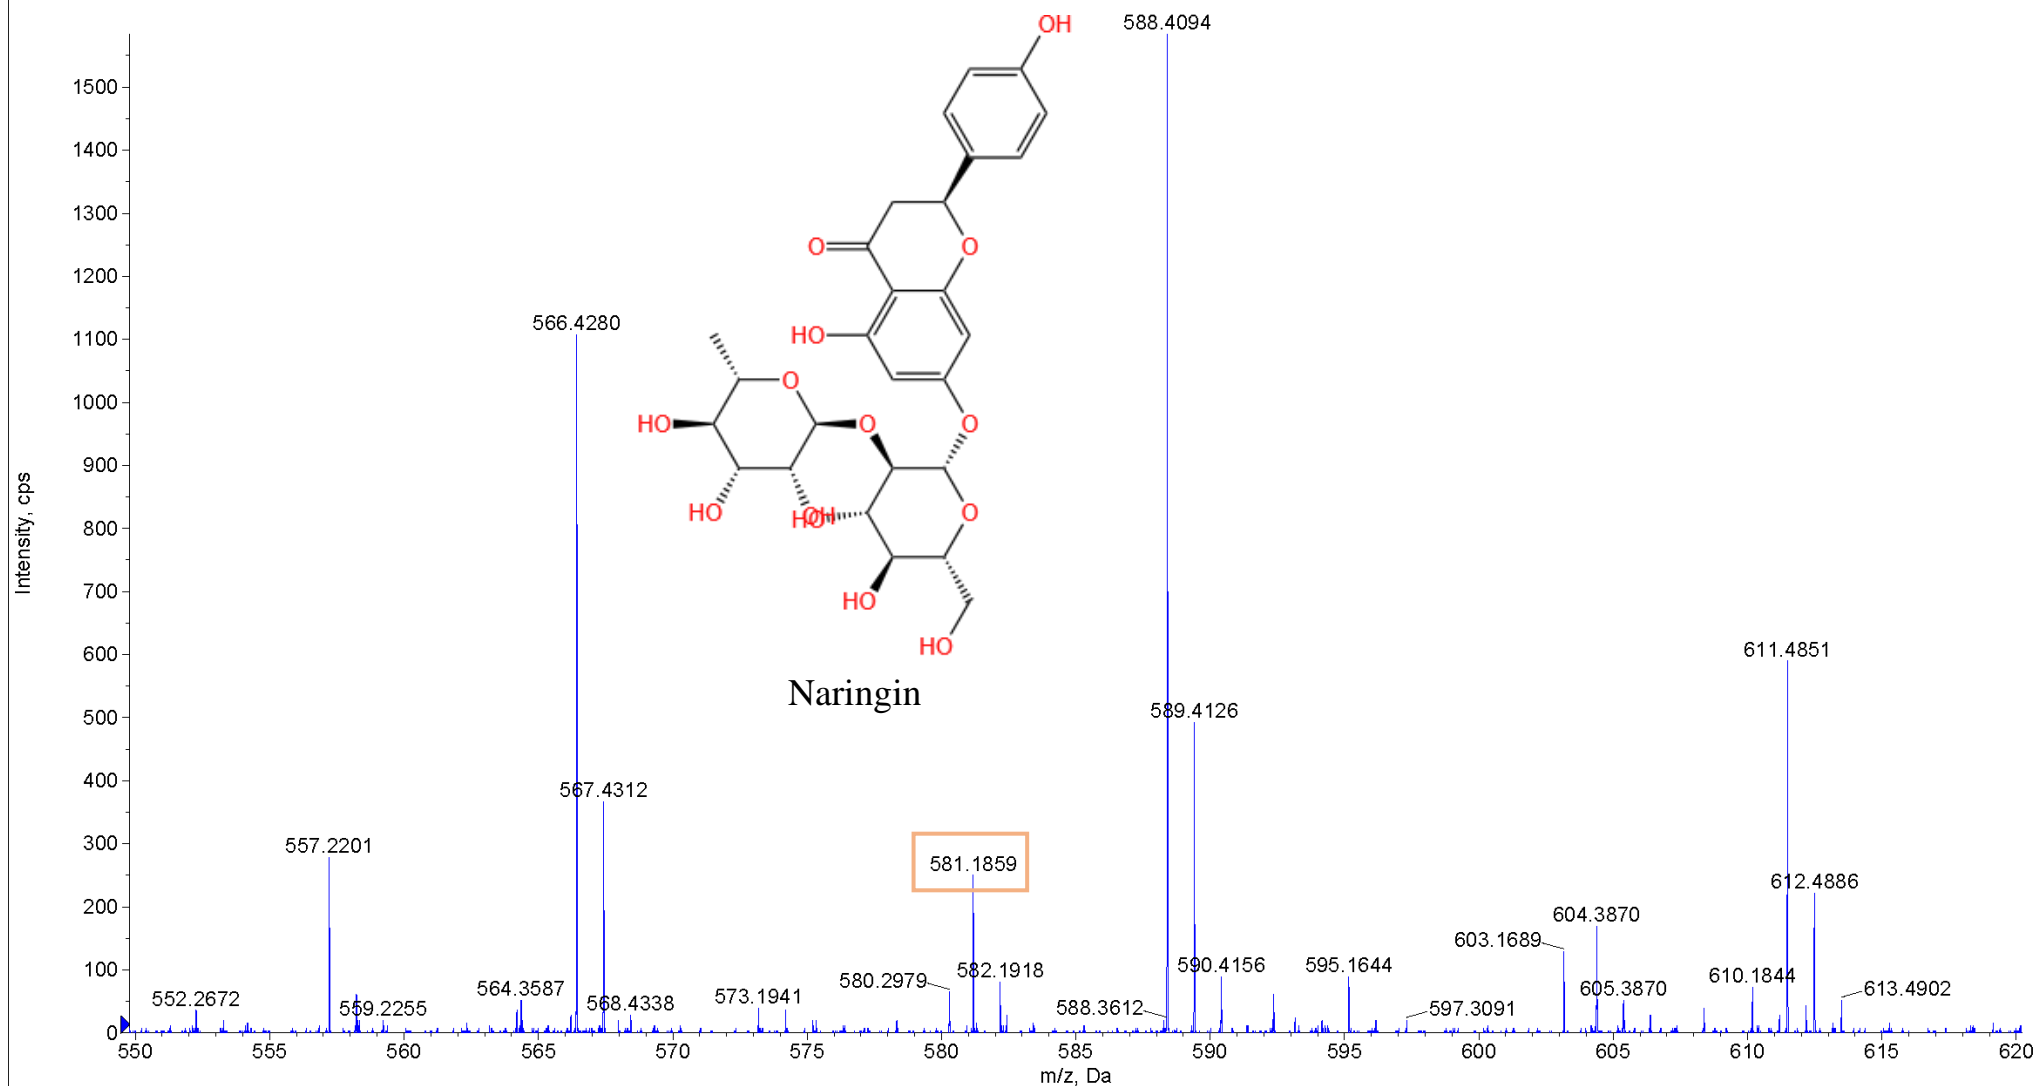

+TOF MS: Exp 1, 11.5898 min from Sample 1 (20221229-POS-32A) of 20221229-POS-32A.wiff  
a=7.01936146349402220e-004, t0=9.92810533938675910e-001 (DuoSpray ())

Max. 2050.0 cps.

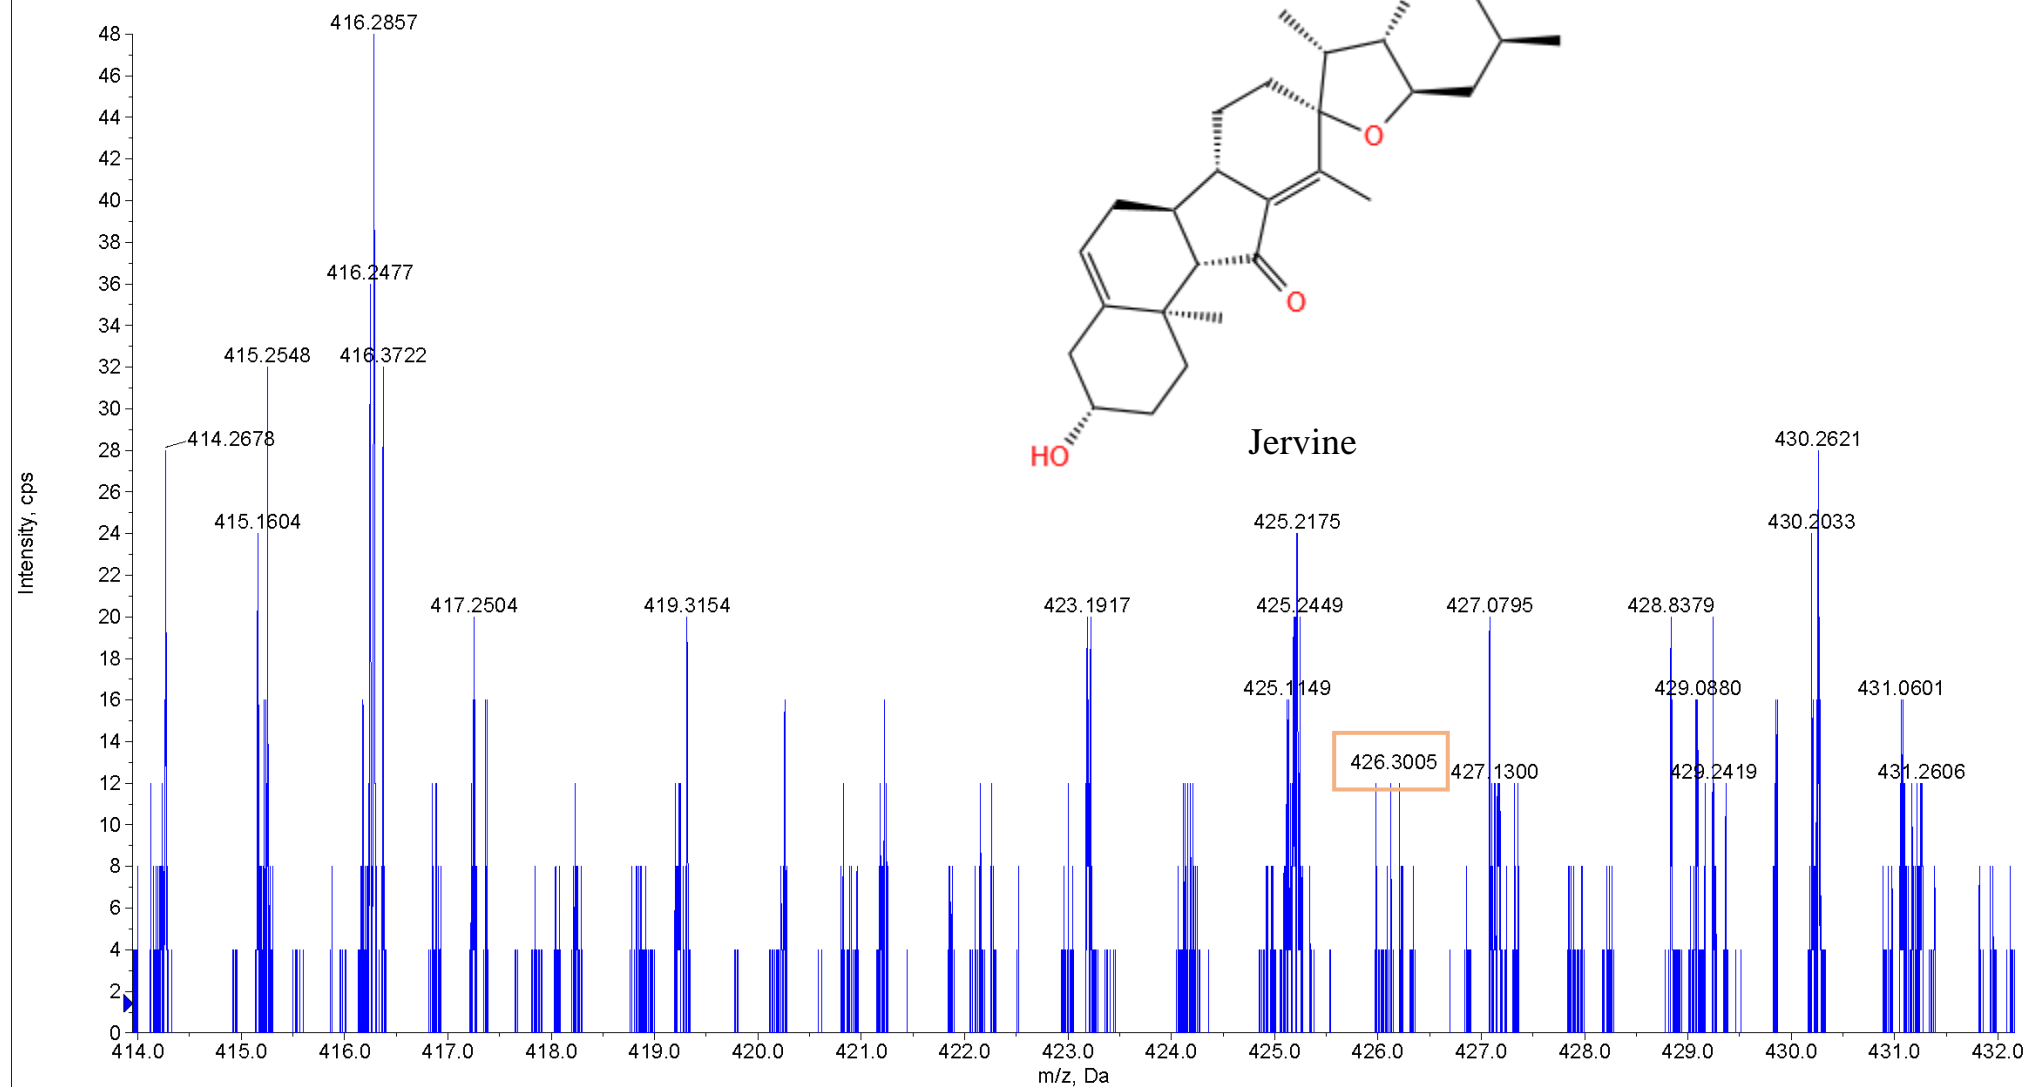

+TOF MS: Exp 1, 23.1533 min from Sample 1 (20221229-POS-56H) of 20221229-POS-56H.wiff  
a=7.01935853906289200e-004, t0=1.00709575939345400e+000 (DuoSpray (j))

Max. 9.5e5 cps.

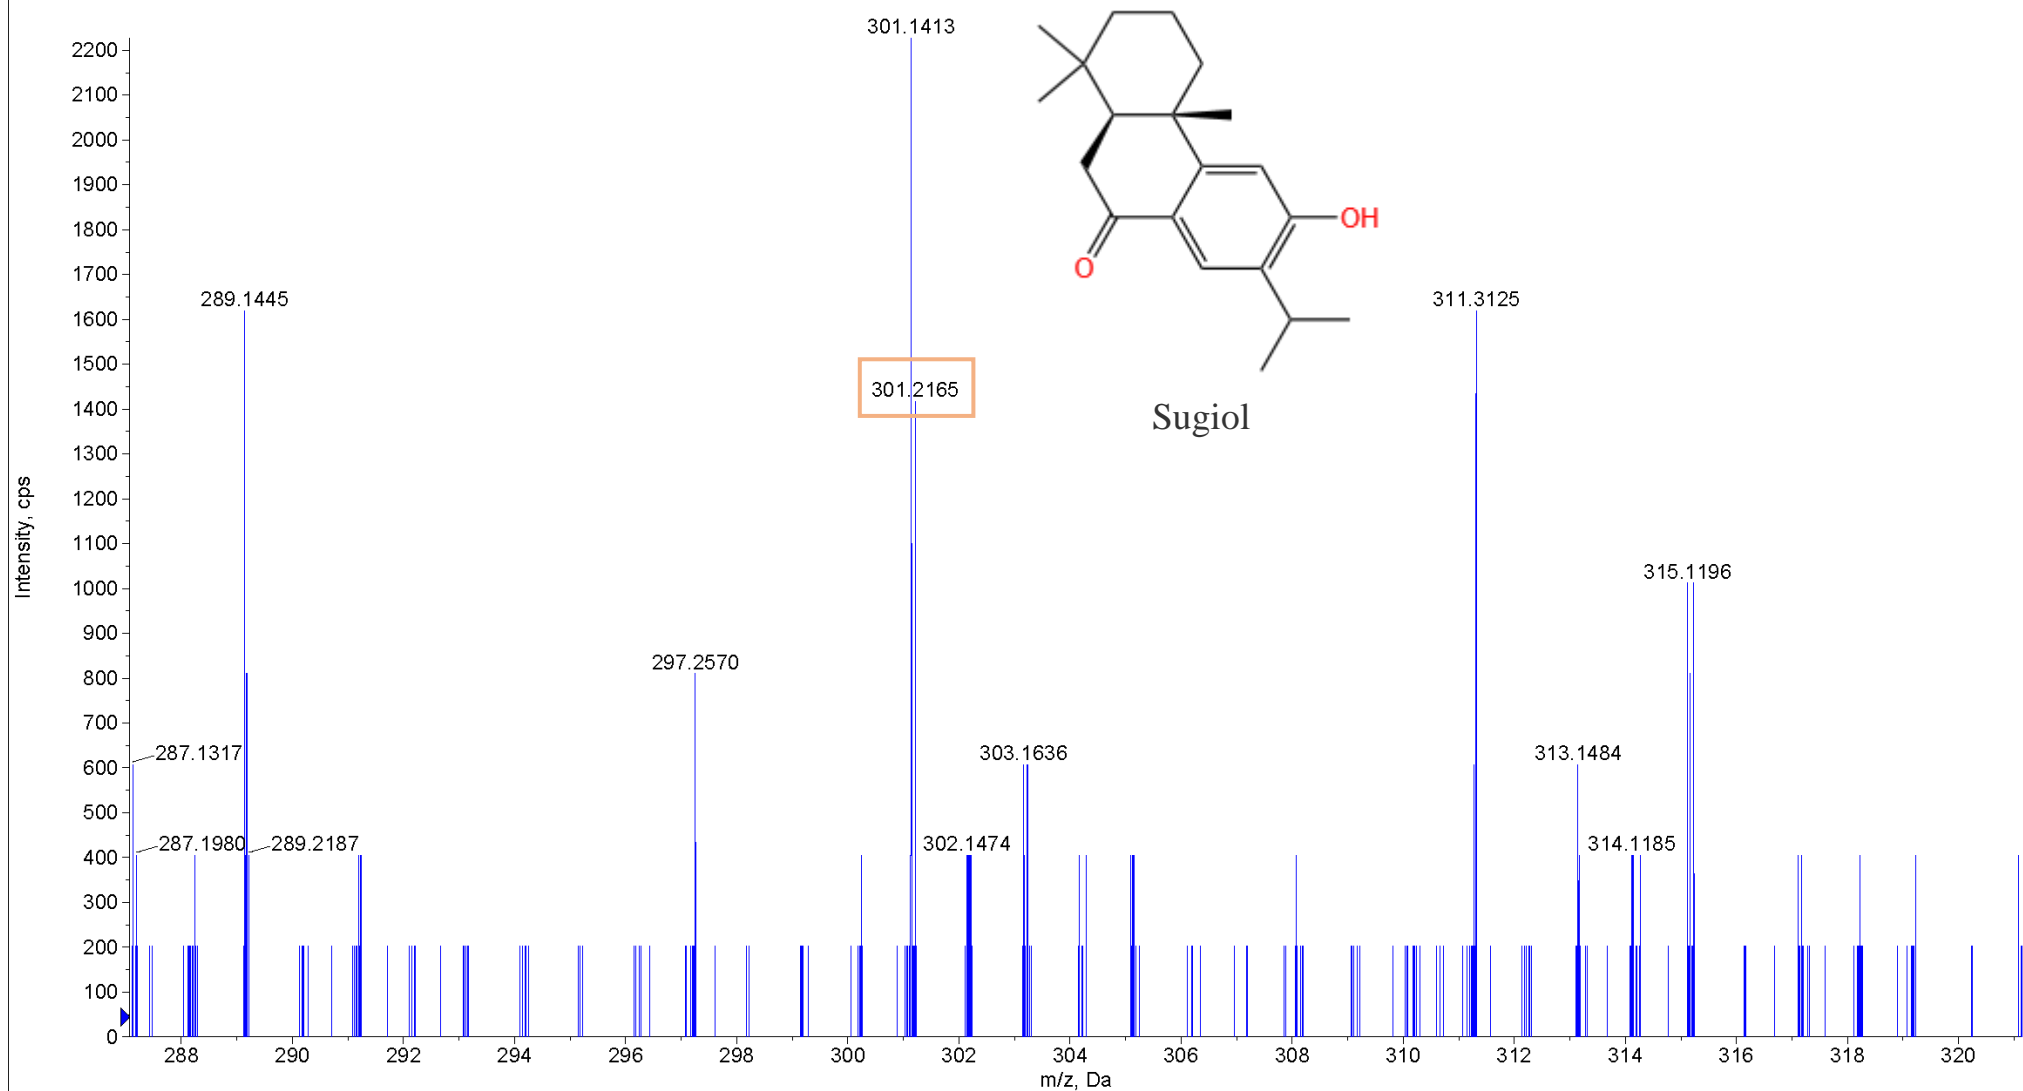



+TOF MS: Exp 1, 19.3588 min from Sample 1 (20221229-POS-56H) of 20221229-POS-56H.wiff  
a=7.01935122923889050e-004, t0=9.95734410254321300e-001 (DuoSpray ( ))

Max. 5301.0 cps.

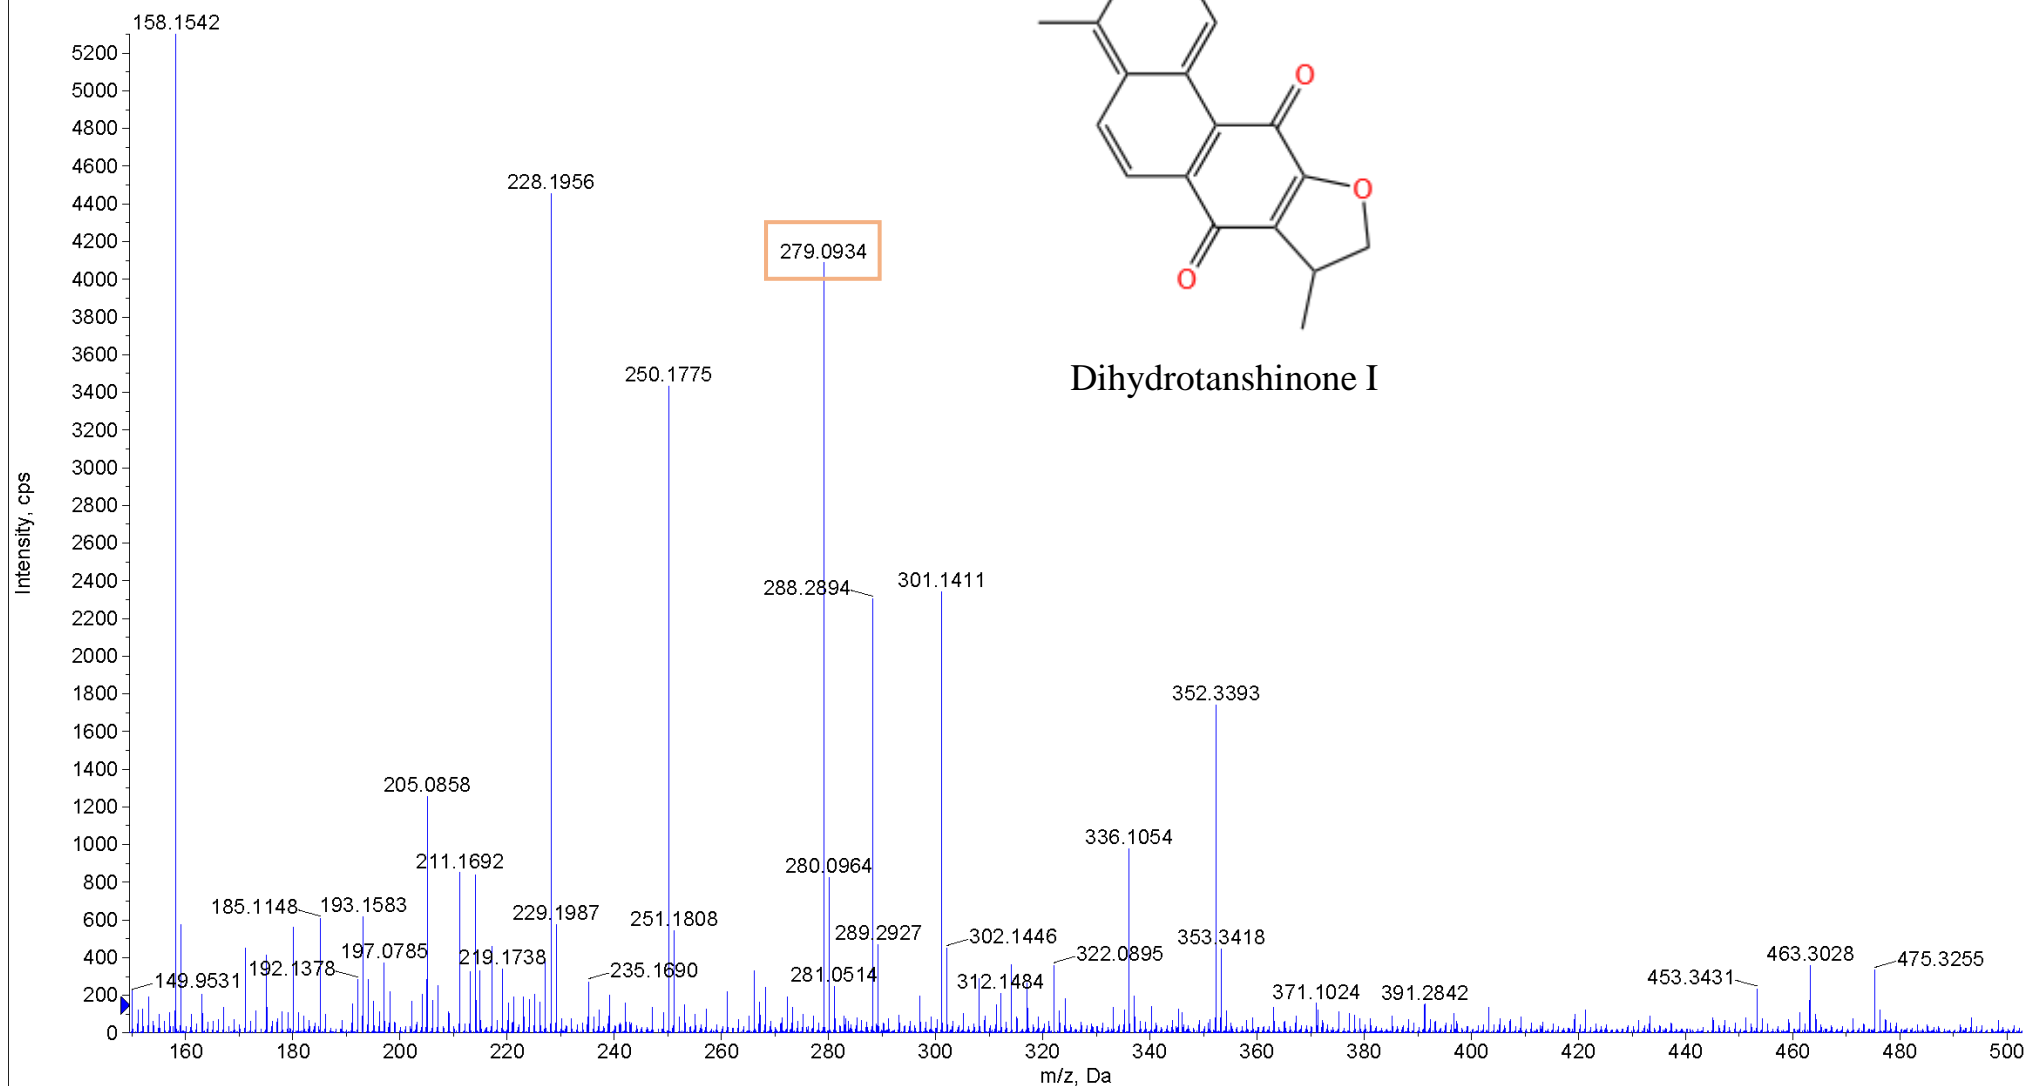

+TOF MS: Exp 1, 26.4680 min from Sample 1 (20221229-POS-56H) of 20221229-POS-56H.wiff  
a=7.01934684566598370e-004, t0=9.67200217393149990e-001 (DuoSpray ())

Max. 4.9e5 cps.

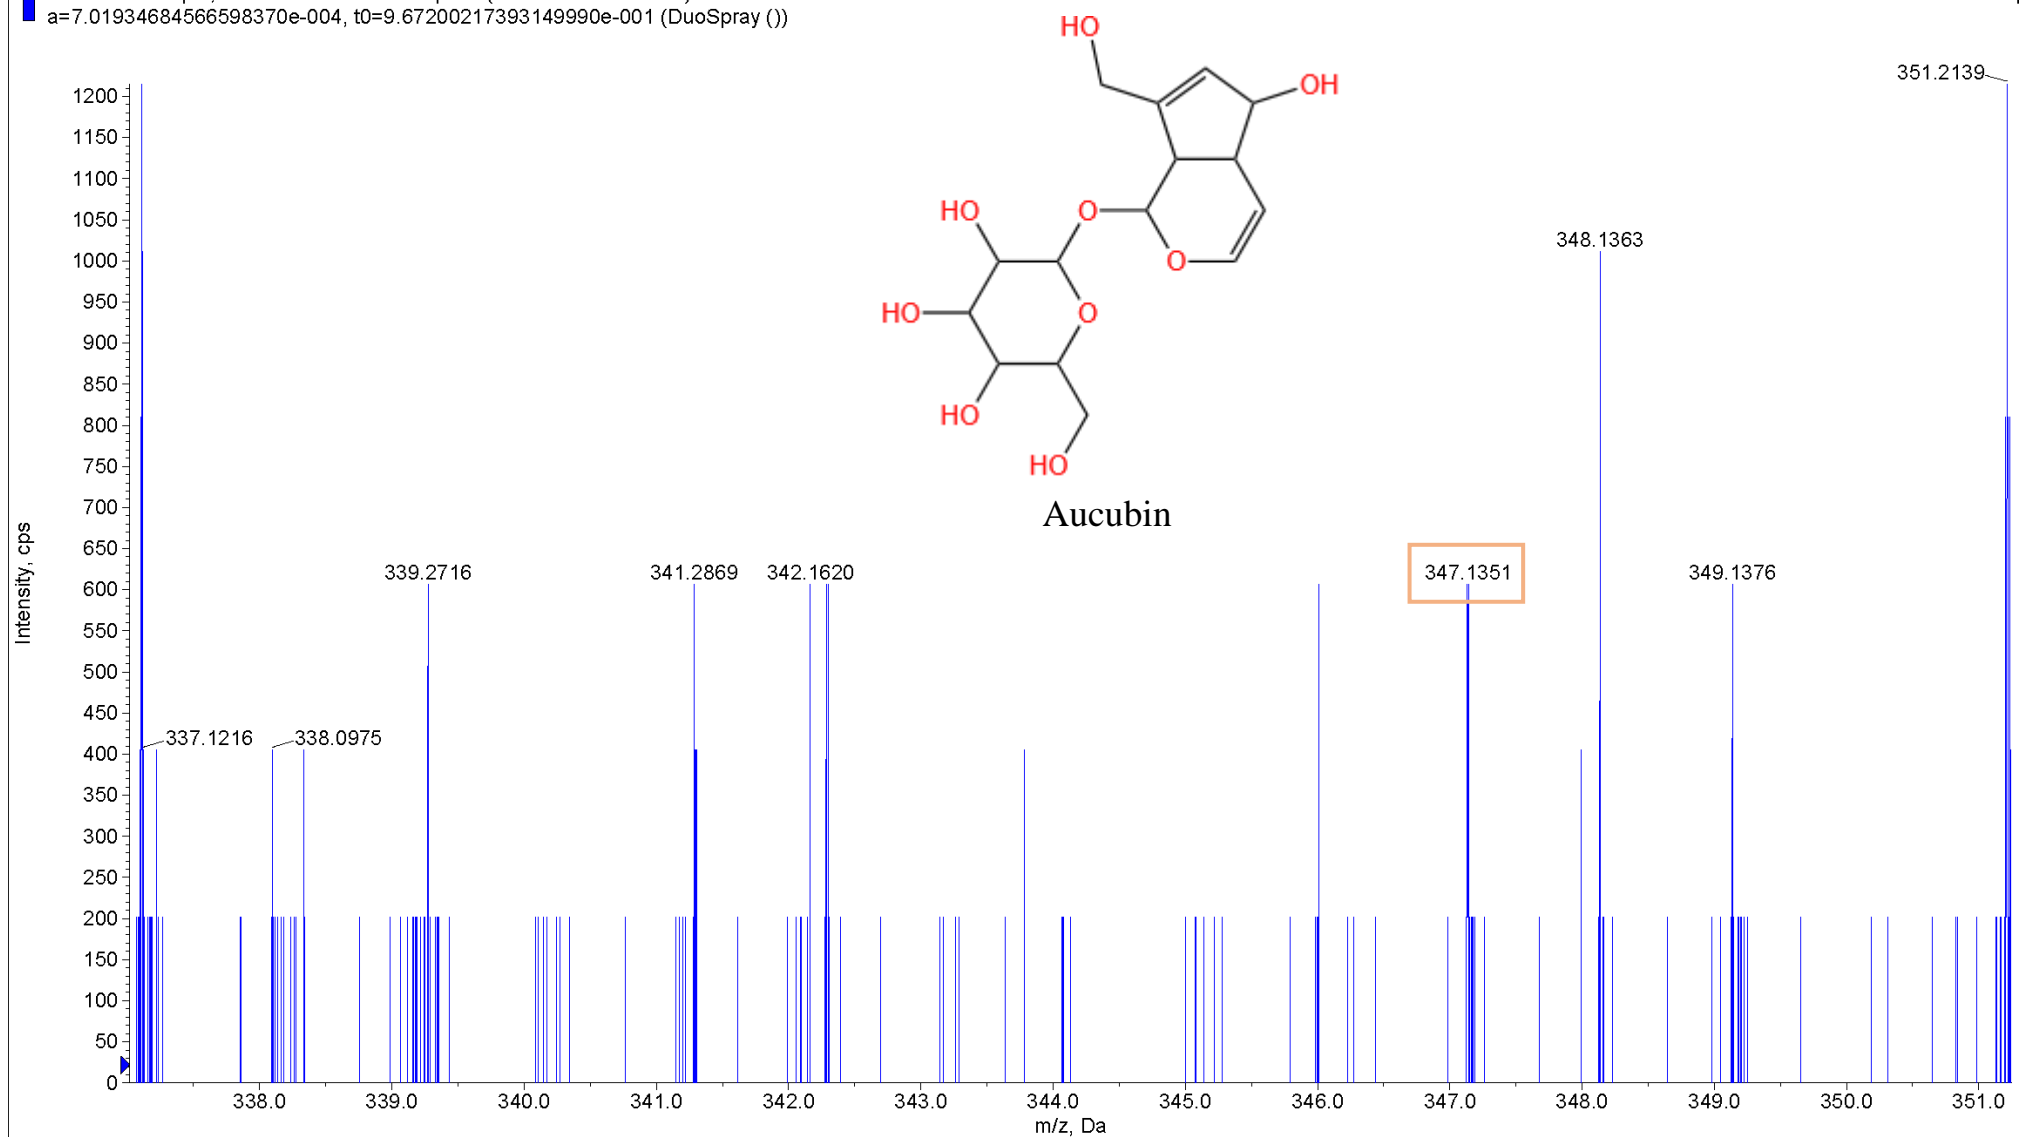

Max. 19.3 cps.

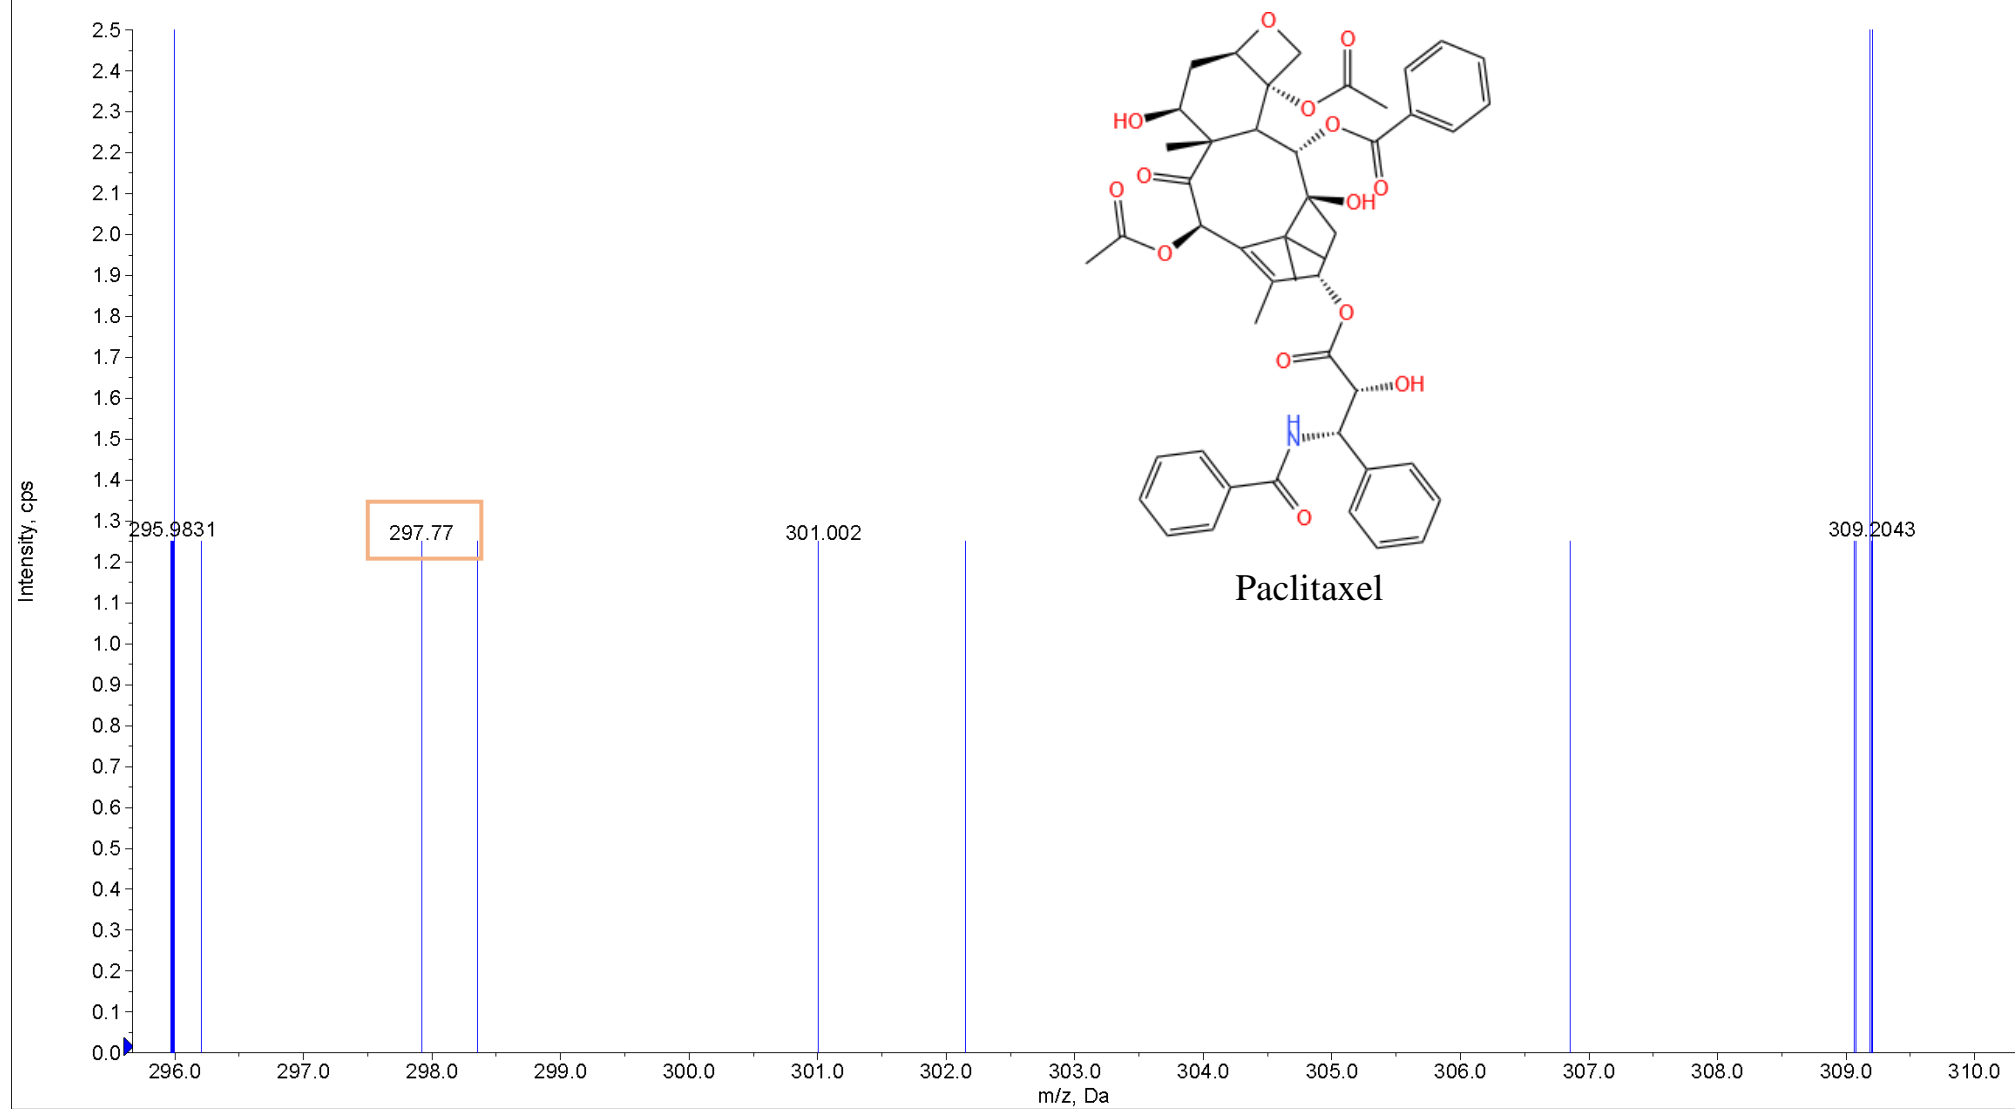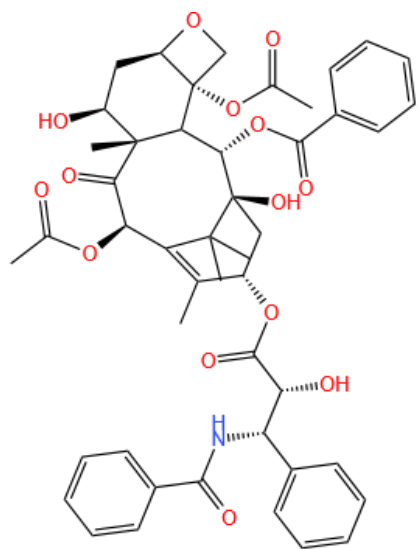

# Paclitaxel
